# Supplementary material
Source: Research Square preprint supplement (doi:10.21203/rs.3.rs-10350693/v1)
Supplement: Supplementary file 1 [file 526006bc7e1ffbfc30c1b30f.docx]

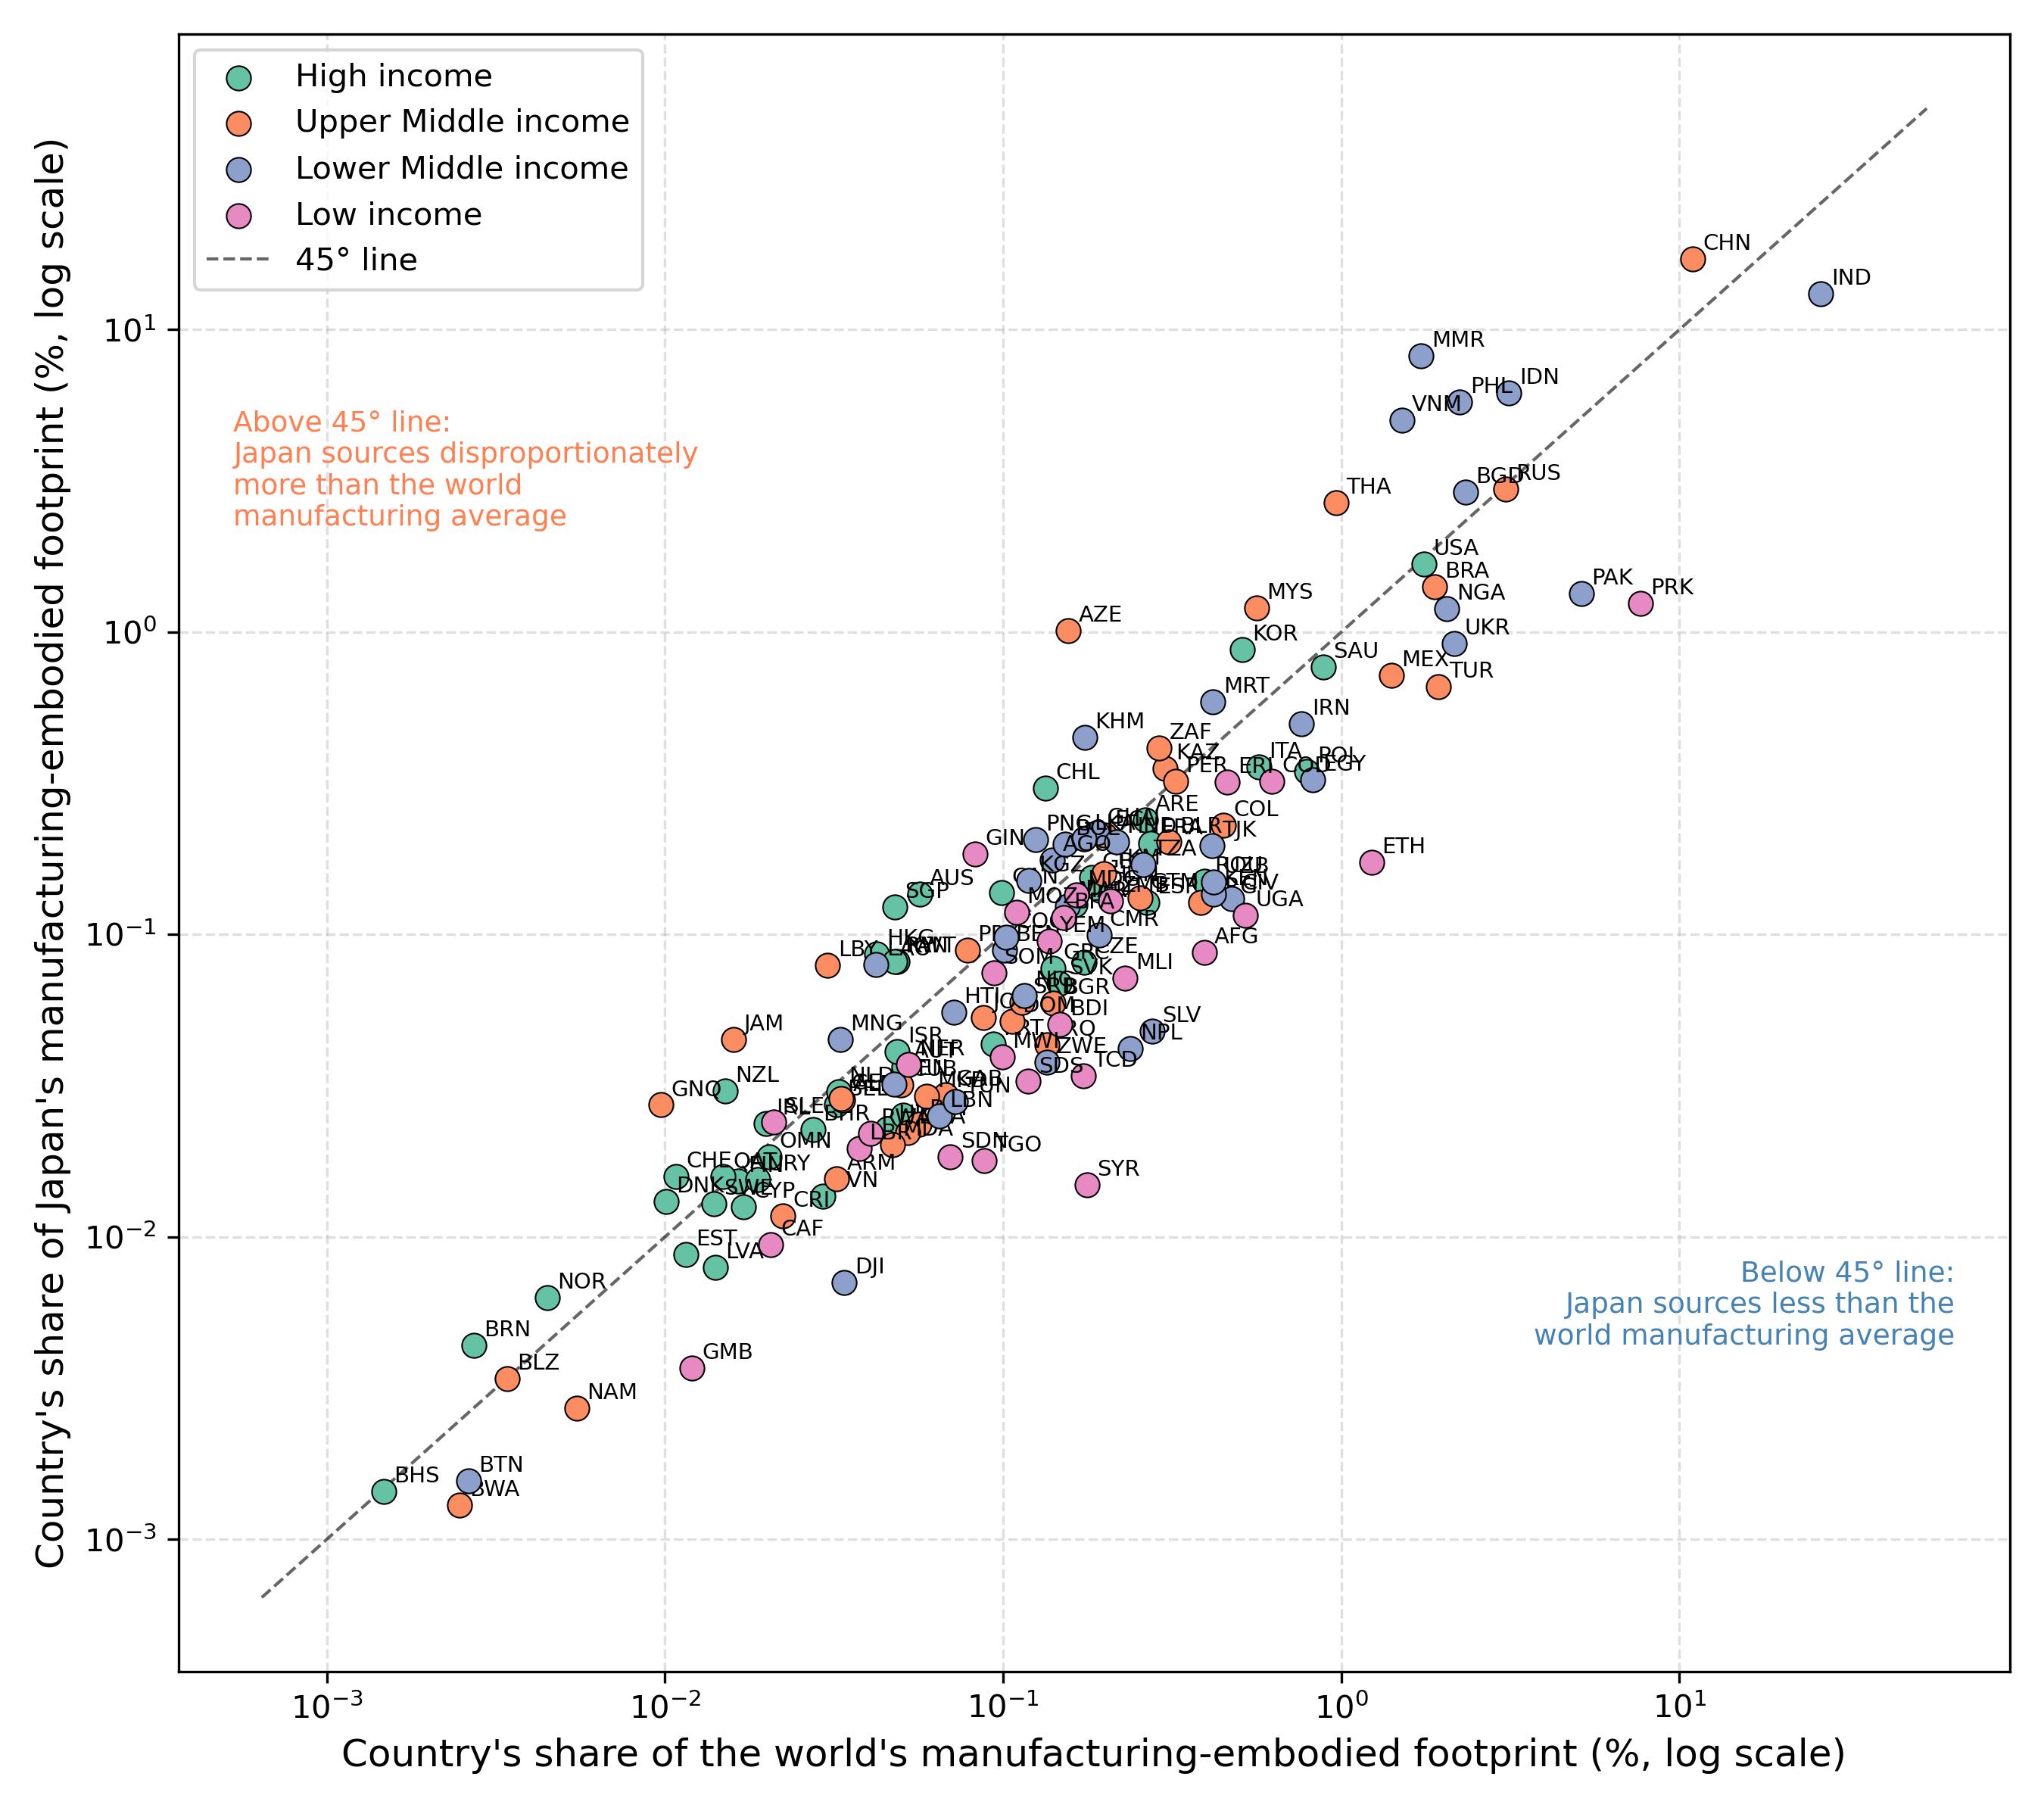


**Figure S1**. Japan's forced labour footprint concentration relative to the global manufacturing footprint distribution, by country and income group (log-log scale)


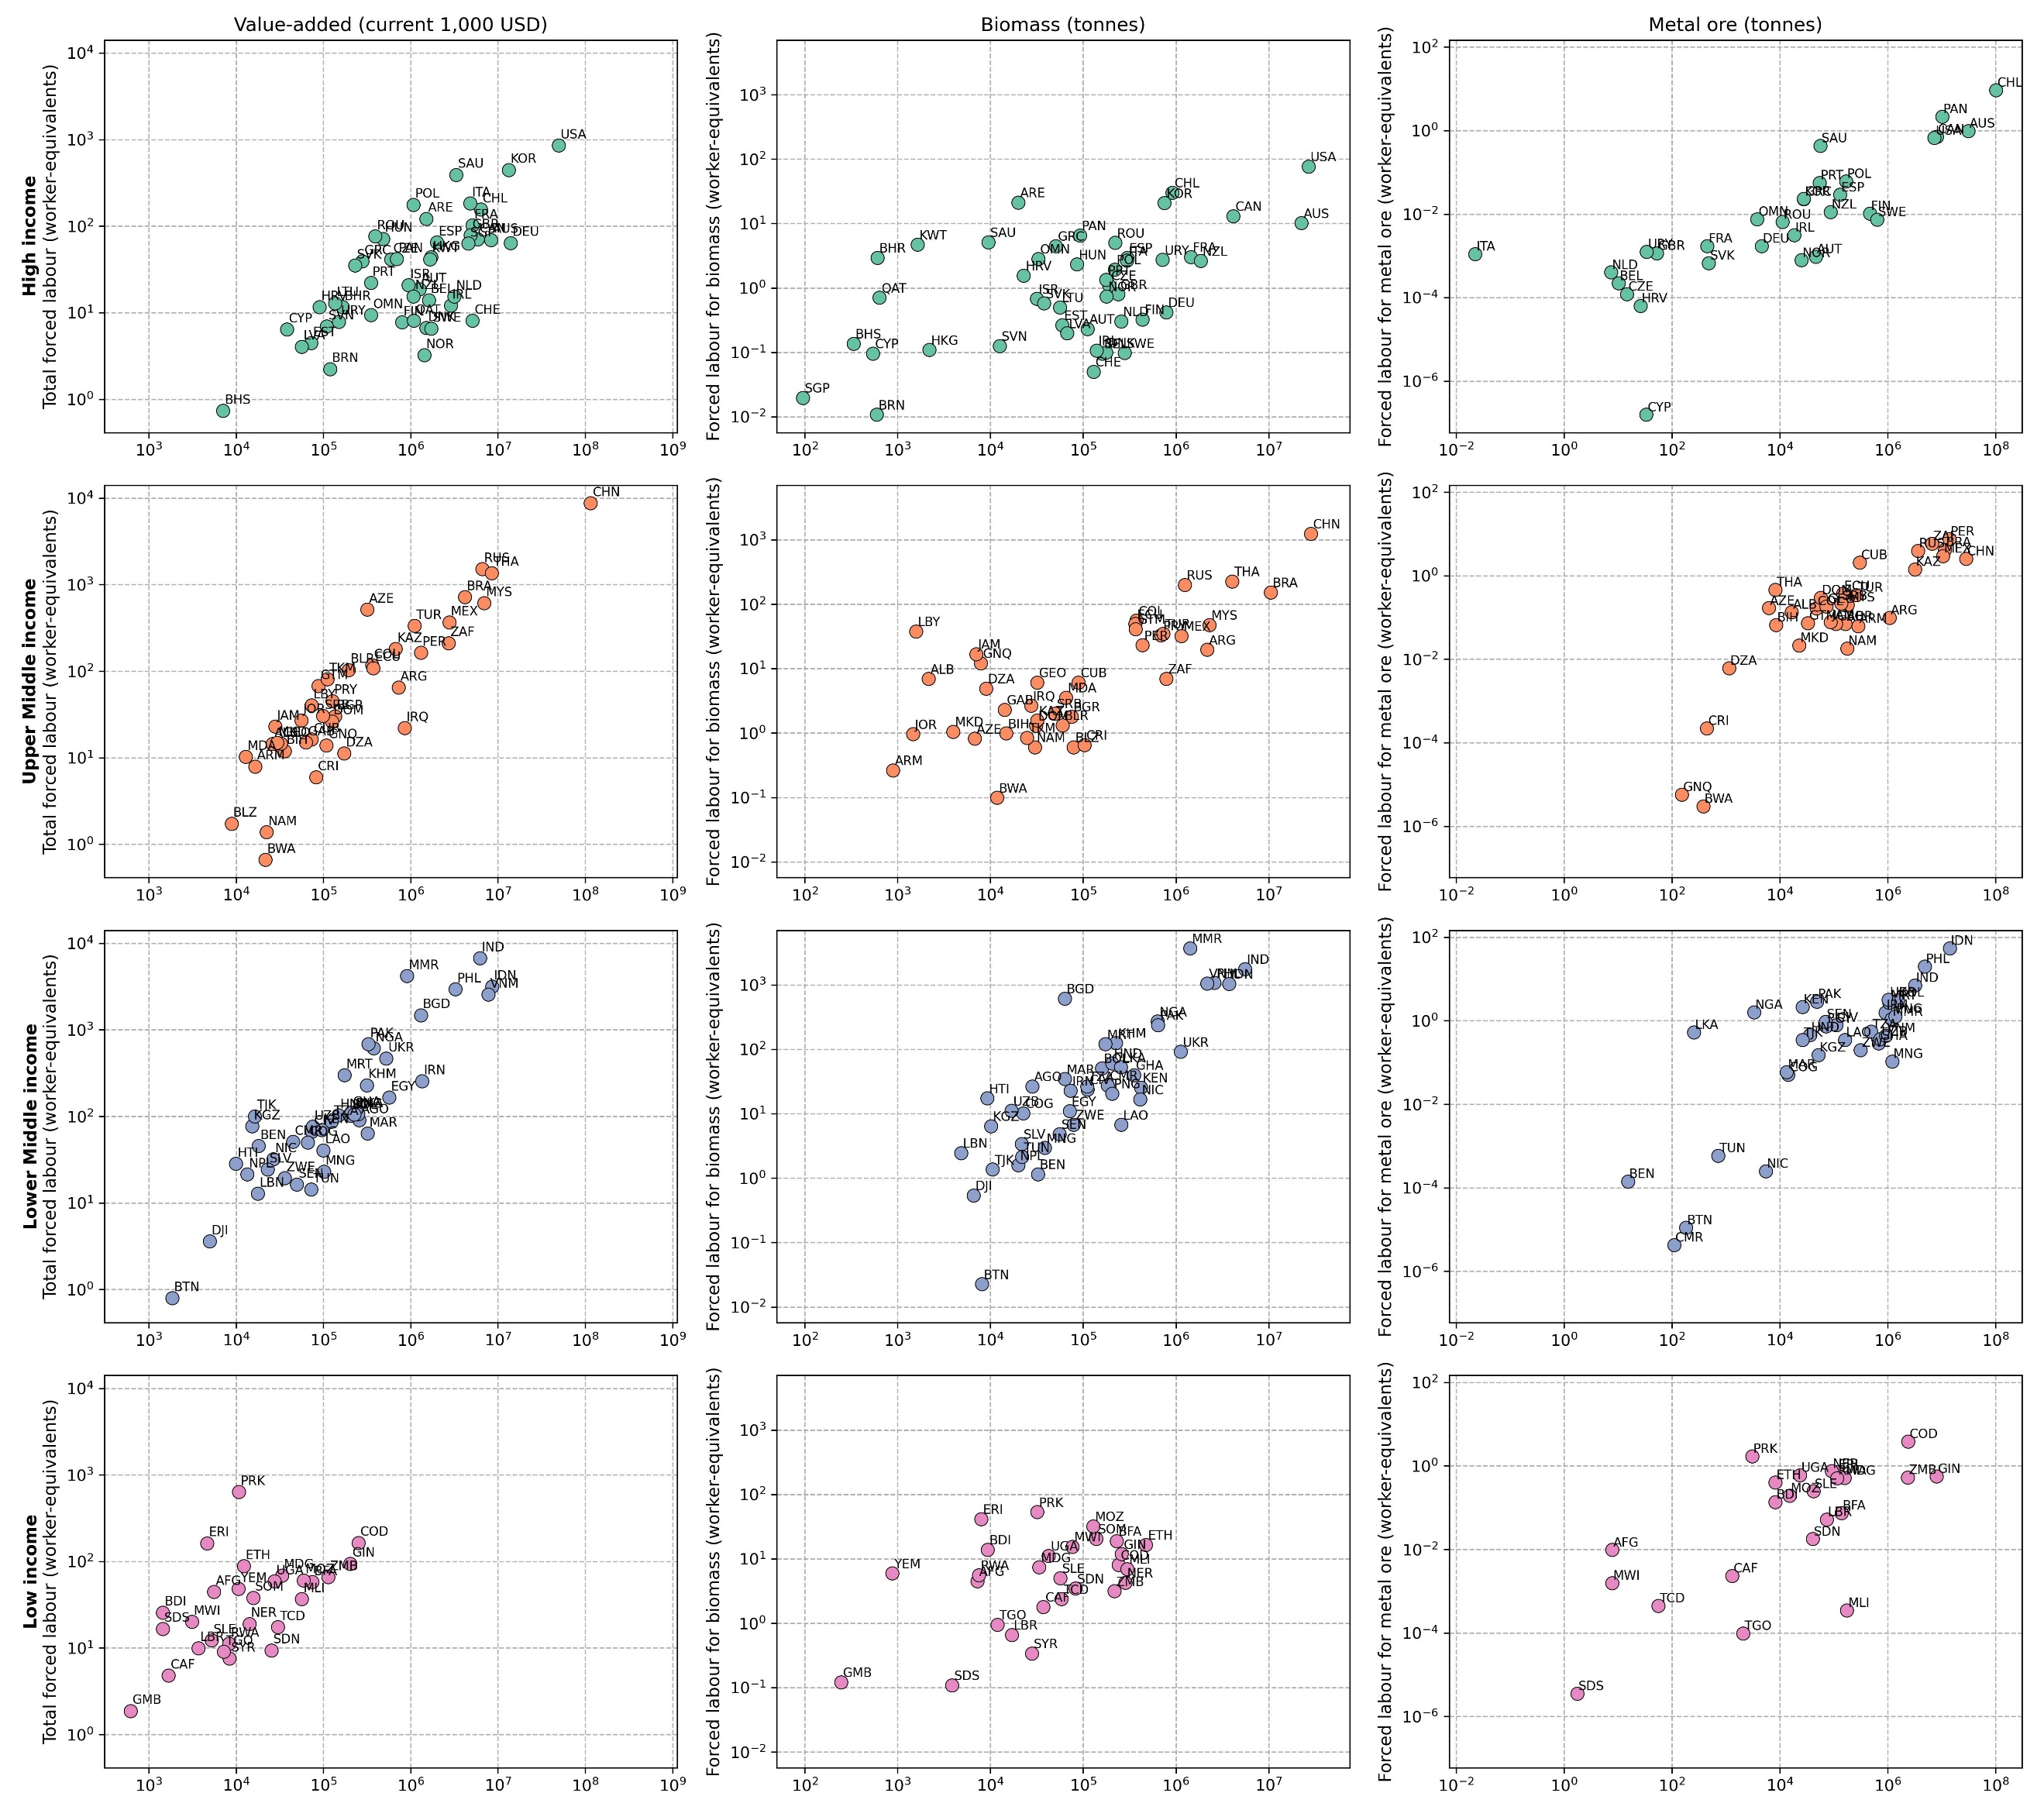


**Figure S2**. Japan-induced forced labour risk footprint in relation to embodied value-added, biomass extraction, and metal ore extraction, by supplier-country income group (log-log scale)
