# Supplementary material
Source: Research Square preprint supplement (doi:10.21203/rs.3.rs-10350693/v1)
Supplement: Supplementary file 2 [file cccb0d7177c033a241ebc38c.xlsx]

## Sheet: Readme
	Note:
	Table S1	List of countries in GLORIA, regions, and income group
	Table S2	List of industries in GLORIA, sector categories, manufacturing categories, and scaling values
	Table S3	PIFL ratio by gender and income group
	Table S4	Number and share of PIFL by gender and sector
	Table S5	List of relative risk weight
	Table S6	Top 20 countries by Japan's share of country-level PIFL
	Table S7	Sensitivity of the main results to the high-risk sector weight (1, 3, 5 [baseline], 10)
	Table S8	Sensitivity of the main results to +/-25% uncertainty in the GSI prevalence estimates (correlated shifts and independent Monte Carlo)

## Sheet: Table S1
No.	Region_acronyms	Region_names	Region_category	Income_group_2021
1	XAM	Rest of Americas	Americas	RoW
2	XEU	Rest of Europe	Europe and Central Asia	RoW
3	XAF	Rest of Africa	Africa	RoW
4	XAS	Rest of Asia-Pacific	Asia and the Pacific	RoW
5	AFG	Afghanistan	Asia and the Pacific	Low
6	AGO	Angola	Africa	Lower Middle
7	ALB	Albania	Europe and Central Asia	Upper Middle
8	ARE	United Arab Emirates	Arab States	High
9	ARG	Argentina	Americas	Upper Middle
10	ARM	Armenia	Europe and Central Asia	Upper Middle
11	AUS	Australia	Asia and the Pacific	High
12	AUT	Austria	Europe and Central Asia	High
13	AZE	Azerbaijan	Europe and Central Asia	Upper Middle
14	BDI	Burundi	Africa	Low
15	BEL	Belgium	Europe and Central Asia	High
16	BEN	Benin	Africa	Lower Middle
17	BFA	Burkina Faso	Africa	Low
18	BGD	Bangladesh	Asia and the Pacific	Lower Middle
19	BGR	Bulgaria	Europe and Central Asia	Upper Middle
20	BHR	Bahrain	Arab States	High
21	BHS	Bahamas	Americas	High
22	BIH	Bosnia and Herzegovina	Europe and Central Asia	Upper Middle
23	BLR	Belarus	Europe and Central Asia	Upper Middle
24	BLZ	Belize	Americas	Upper Middle
25	BOL	Bolivia	Americas	Lower Middle
26	BRA	Brazil	Americas	Upper Middle
27	BRN	Brunei Darussalam	Asia and the Pacific	High
28	BTN	Bhutan	Asia and the Pacific	Lower Middle
29	BWA	Botswana	Africa	Upper Middle
30	CAF	Central African Republic	Africa	Low
31	CAN	Canada	Americas	High
32	CHE	Switzerland	Europe and Central Asia	High
33	CHL	Chile	Americas	High
34	CHN	China	Asia and the Pacific	Upper Middle
35	CIV	Cote d'Ivoire	Africa	Lower Middle
36	CMR	Cameroon	Africa	Lower Middle
37	COD	DR Congo	Africa	Low
38	COG	Rep Congo	Africa	Lower Middle
39	COL	Colombia	Americas	Upper Middle
40	CRI	Costa Rica	Americas	Upper Middle
41	CUB	Cuba	Americas	Upper Middle
42	CYP	Cyprus	Europe and Central Asia	High
43	CZE	CSSR/Czech Republic (1990/1991)	Europe and Central Asia	High
44	DEU	Germany	Europe and Central Asia	High
45	DJI	Djibouti	Africa	Lower Middle
46	DYE	DR Yemen (Aden)	Arab States	Low
47	DNK	Denmark	Europe and Central Asia	High
48	DOM	Dominican Republic	Americas	Upper Middle
49	DZA	Algeria	Africa	Upper Middle
50	ECU	Ecuador	Americas	Upper Middle
51	EGY	Egypt	Africa	Lower Middle
52	ERI	Eritrea	Africa	Low
53	ESP	Spain	Europe and Central Asia	High
54	EST	Estonia	Europe and Central Asia	High
55	ETH	Ethiopia/DR Ethiopia (1992/1993)	Africa	Low
56	FIN	Finland	Europe and Central Asia	High
57	FRA	France	Europe and Central Asia	High
58	GAB	Gabon	Africa	Upper Middle
59	GBR	United Kingdom	Europe and Central Asia	High
60	GEO	Georgia	Europe and Central Asia	Upper Middle
61	GHA	Ghana	Africa	Lower Middle
62	GIN	Guinea	Africa	Low
63	GMB	Gambia	Africa	Low
64	GNQ	Equatorial Guinea	Africa	Upper Middle
65	GRC	Greece	Europe and Central Asia	High
66	GTM	Guatemala	Americas	Upper Middle
67	HND	Honduras	Americas	Lower Middle
68	HKG	Hong Kong	Asia and the Pacific	High
69	HRV	Croatia	Europe and Central Asia	High
70	HTI	Haiti	Americas	Lower Middle
71	HUN	Hungary	Europe and Central Asia	High
72	IDN	Indonesia	Asia and the Pacific	Lower Middle
73	IND	India	Asia and the Pacific	Lower Middle
74	IRL	Ireland	Europe and Central Asia	High
75	IRN	Iran	Asia and the Pacific	Lower Middle
76	IRQ	Iraq	Arab States	Upper Middle
77	ISL	Iceland	Europe and Central Asia	High
78	ISR	Israel	Europe and Central Asia	High
79	ITA	Italy	Europe and Central Asia	High
80	JAM	Jamaica	Americas	Upper Middle
81	JOR	Jordan	Arab States	Upper Middle
82	JPN	Japan	Asia and the Pacific	High
83	KAZ	Kazakhstan	Europe and Central Asia	Upper Middle
84	KEN	Kenya	Africa	Lower Middle
85	KGZ	Kyrgyzstan	Europe and Central Asia	Lower Middle
86	KHM	Cambodia	Asia and the Pacific	Lower Middle
87	KOR	South Korea	Asia and the Pacific	High
88	KWT	Kuwait	Arab States	High
89	LAO	Laos	Asia and the Pacific	Lower Middle
90	LBN	Lebanon	Arab States	Lower Middle
91	LBR	Liberia	Africa	Low
92	LBY	Libya	Africa	Upper Middle
93	LKA	Sri Lanka	Asia and the Pacific	Lower Middle
94	LTU	Lithuania	Europe and Central Asia	High
95	LUX	Luxembourg	Europe and Central Asia	High
96	LVA	Latvia	Europe and Central Asia	High
97	MAR	Morocco	Africa	Lower Middle
98	MDA	Moldova	Europe and Central Asia	Upper Middle
99	MDG	Madagascar	Africa	Low
100	MEX	Mexico	Americas	Upper Middle
101	MKD	Macedonia	Europe and Central Asia	Upper Middle
102	MLI	Mali	Africa	Low
103	MLT	Malta	Europe and Central Asia	High
104	MMR	Myanmar	Asia and the Pacific	Lower Middle
105	MNG	Mongolia	Asia and the Pacific	Lower Middle
106	MOZ	Mozambique	Africa	Low
107	MRT	Mauritania	Africa	Lower Middle
108	MWI	Malawi	Africa	Low
109	MYS	Malaysia	Asia and the Pacific	Upper Middle
110	NAM	Namibia	Africa	Upper Middle
111	NER	Niger	Africa	Low
112	NGA	Nigeria	Africa	Lower Middle
113	NIC	Nicaragua	Americas	Lower Middle
114	NLD	Netherlands	Europe and Central Asia	High
115	NOR	Norway	Europe and Central Asia	High
116	NPL	Nepal	Asia and the Pacific	Lower Middle
117	NZL	New Zealand	Asia and the Pacific	High
118	OMN	Oman	Arab States	High
119	PAK	Pakistan	Asia and the Pacific	Lower Middle
120	PSE	Palestine	Arab States	RoW
121	PAN	Panama	Americas	High
122	PER	Peru	Americas	Upper Middle
123	PHL	Philippines	Asia and the Pacific	Lower Middle
124	PNG	Papua New Guinea	Asia and the Pacific	Lower Middle
125	POL	Poland	Europe and Central Asia	High
126	PRK	North Korea	Asia and the Pacific	Low
127	PRT	Portugal	Europe and Central Asia	High
128	PRY	Paraguay	Americas	Upper Middle
129	QAT	Qatar	Arab States	High
130	ROU	Romania	Europe and Central Asia	High
131	RUS	USSR/Russian Federation (1990/1991)	Europe and Central Asia	Upper Middle
132	RWA	Rwanda	Africa	Low
133	SAU	Saudi Arabia	Arab States	High
134	SDS	South Sudan	Africa	Low
135	SEN	Senegal	Africa	Lower Middle
136	SGP	Singapore	Asia and the Pacific	High
137	SLE	Sierra Leone	Africa	Low
138	SLV	El Salvador	Americas	Lower Middle
139	SOM	Somalia	Africa	Low
140	SRB	Yugoslavia/Serbia (1991/1992)	Europe and Central Asia	Upper Middle
141	SDN	Sudan/North Sudan (2010/2011)	Africa	Low
142	SVK	Slovakia	Europe and Central Asia	High
143	SVN	Slovenia	Europe and Central Asia	High
144	SWE	Sweden	Europe and Central Asia	High
145	SYR	Syria	Arab States	Low
146	TCD	Chad	Africa	Low
147	TGO	Togo	Africa	Low
148	THA	Thailand	Asia and the Pacific	Upper Middle
149	TJK	Tajikistan	Europe and Central Asia	Lower Middle
150	TKM	Turkmenistan	Europe and Central Asia	Upper Middle
151	TUN	Tunisia	Africa	Lower Middle
152	TUR	Turkey	Europe and Central Asia	Upper Middle
153	TZA	Tanzania	Africa	Lower Middle
154	UGA	Uganda	Africa	Low
155	UKR	Ukraine	Europe and Central Asia	Lower Middle
156	URY	Uruguay	Americas	High
157	USA	United States of America	Americas	High
158	UZB	Uzbekistan	Europe and Central Asia	Lower Middle
159	VEN	Venezuela	Americas	RoW
160	VNM	Viet Nam	Asia and the Pacific	Lower Middle
161	YEM	Yemen Arab Republic/Yemen (1990/1991)	Arab States	Low
162	ZAF	South Africa	Africa	Upper Middle
163	ZMB	Zambia	Africa	Low
164	ZWE	Zimbabwe	Africa	Lower Middle

## Sheet: Table S2
No.	Industry_names	Sector_category	Manufacturing_category	USDOL List goods mapped to GLORIA industries	Scaling_value_M	Scaling_value_F
1	Growing wheat	Agriculture		Wheat	0.00609524	0.00538095
2	Growing maize	Agriculture		Corn	0.00609524	0.00538095
3	Growing cereals n.e.c	Agriculture		Cereal Grains	0.00609524	0.00538095
4	Growing leguminous crops and oil seeds	Agriculture		Beans, Beans (green, soy, yellow), Palm Fruit, Peanuts, Pulses (legumes), Sesame, Sunflowers	0.00609524	0.00538095
5	Growing rice	Agriculture		Rice	0.00609524	0.00538095
6	Growing vegetables, roots, tubers	Agriculture		Beans (green beans), Broccoli, Cabbages, Carrots, Cucumbers, Eggplants, Garlic, Lettuce, Manioc/Cassava, Onions, Peppers, Potatoes, Sweet Potatoes, Tomatoes	0.00609524	0.00538095
7	Growing sugar beet and cane	Agriculture		Sugar Beets, Sugarcane	0.00609524	0.00538095
8	Growing tobacco	Agriculture		Tobacco	0.00609524	0.00538095
9	Growing fibre crops	Agriculture		Cotton, Sisal	0.00609524	0.00538095
10	Growing crops n.e.c.	Agriculture		Flowers, Rubber, Silk Cocoons	0.00609524	0.00538095
11	Growing grapes	Agriculture		Grapes	0.00609524	0.00538095
12	Growing fruits and nuts	Agriculture		Açaí Berries, Bananas, Blueberries, Brazil Nuts/Chestnuts, Cashews, Citrus Fruits, Coconuts, Fruits (Pome and Stone), Hazelnuts, Melons, Olives, Pineapples, Strawberries	0.00609524	0.00538095
13	Growing beverage crops (coffee, tea etc)	Agriculture		Cocoa, Coffee, Tea, Yerba Mate (stimulant plant)	0.00609524	0.00538095
14	Growing spices, aromatic, drug and pharmaceutical crops	Agriculture		Chile Peppers, Cloves, Coca (stimulant plant), Cumin, Khat, Khat/Miraa (stimulant plant), Pepper, Poppies, Vanilla	0.00609524	0.00538095
15	Seeds and plant propagation	Agriculture		Cottonseed (hybrid)	0.00609524	0.00538095
16	Raising of cattle	Agriculture		Bovines, Cattle	0.00609524	0.00538095
17	Raising of sheep and goats	Agriculture		Goats, Sheep	0.00609524	0.00538095
18	Raising of swine/pigs	Agriculture		Hogs	0.00609524	0.00538095
19	Raising of poultry	Agriculture		Poultry	0.00609524	0.00538095
20	Raising of animals n.e.c.; services to agriculture	Agriculture			0.00609524	0.00538095
21	Forestry and logging	Agriculture		Bamboo, Charcoal, Palm Thatch, Teak, Timber	0.00609524	0.00538095
22	Fishing	Fishery		Fish, Nile Perch (fish), Tilapia (fish)	0.00385031	0.00340086
23	Crustaceans and molluscs	Fishery		Lobsters, Shellfish, Shrimp	0.00385031	0.00340086
24	Hard coal	Mining and quarrying		Coal	0.00123529	0.000176471
25	Lignite and peat	Mining and quarrying			0.00123529	0.000176471
26	Petroleum extraction	Mining and quarrying			0.00123529	0.000176471
27	Gas extraction	Mining and quarrying			0.00123529	0.000176471
28	Iron ores	Mining and quarrying		Iron	0.00123529	0.000176471
29	Uranium ores	Mining and quarrying			0.00123529	0.000176471
30	Aluminium ore	Mining and quarrying			0.00123529	0.000176471
31	Copper ores	Mining and quarrying		Copper	0.00123529	0.000176471
32	Gold ores	Mining and quarrying		Gold	0.00123529	0.000176471
33	Lead/zinc/silver ores	Mining and quarrying		Silver, Zinc	0.00123529	0.000176471
34	Nickel ores	Mining and quarrying			0.00123529	0.000176471
35	Tin ores	Mining and quarrying		Tin, Tin ore (cassiterite)	0.00123529	0.000176471
36	Other non-ferrous ores	Mining and quarrying		Cobalt ore (heterogenite), Tantalum ore (coltan), Tungsten ore (wolframite)	0.00123529	0.000176471
37	Quarrying of stone, sand and clay	Mining and quarrying		Granite, Granite (crushed), Gravel (crushed stones), Sand, Sandstone, Stones, Stones (limestone), Stones (pumice)	0.00123529	0.000176471
38	Chemical and fertilizer minerals	Mining and quarrying		Fluorspar (mineral), Gypsum (mineral), Trona (mineral)	0.00123529	0.000176471
39	Extraction of salt	Mining and quarrying		Salt	0.00123529	0.000176471
40	Mining and quarrying n.e.c.; services to mining	Mining and quarrying		Amber, Diamonds, Emeralds, Gems, Jade, Mica, Rubies, Sapphires, Tanzanite (gems)	0.00123529	0.000176471
41	Beef meat	Manufacturing	Food, Beverages & Tobacco Products	Beef	0.00359615	0.00357692
42	Sheep meat	Manufacturing	Food, Beverages & Tobacco Products		0.00359615	0.00357692
43	Pork	Manufacturing	Food, Beverages & Tobacco Products		0.00359615	0.00357692
44	Poultry meat	Manufacturing	Food, Beverages & Tobacco Products		0.00359615	0.00357692
45	Other meat products	Manufacturing	Food, Beverages & Tobacco Products	Meat	0.00359615	0.00357692
46	Fish products	Manufacturing	Food, Beverages & Tobacco Products	Dried Fish	0.00359615	0.00357692
47	Cereal products	Manufacturing	Food, Beverages & Tobacco Products	Baked Goods	0.00359615	0.00357692
48	Vegetable products	Manufacturing	Food, Beverages & Tobacco Products	Tomato Products	0.00359615	0.00357692
49	Fruit products	Manufacturing	Food, Beverages & Tobacco Products		0.00359615	0.00357692
50	Food products and feeds n.e.c.	Manufacturing	Food, Beverages & Tobacco Products		0.00359615	0.00357692
51	Sugar refining; cocoa, chocolate and confectionery	Manufacturing	Food, Beverages & Tobacco Products		0.00359615	0.00357692
52	Animal oils and fats	Manufacturing	Food, Beverages & Tobacco Products		0.00359615	0.00357692
53	Vegetable oils and fats	Manufacturing	Food, Beverages & Tobacco Products		0.00359615	0.00357692
54	Dairy products	Manufacturing	Food, Beverages & Tobacco Products	Dairy Products	0.00359615	0.00357692
55	Alcoholic and other beverages	Manufacturing	Food, Beverages & Tobacco Products	Alcoholic Beverages	0.00359615	0.00357692
56	Tobacco products	Manufacturing	Food, Beverages & Tobacco Products	Bidis (hand-rolled cigarettes)	0.00359615	0.00357692
57	Textiles and clothing	Manufacturing	Textiles, Apparel & Leather Products	Carpets, Embellished Textiles, Garments, Hair Products, Silk Fabric, Silk Thread, Textiles, Textiles (hand-woven), Textiles (jute), Thread/Yarn	0.00359615	0.00357692
58	Leather and footwear	Manufacturing	Textiles, Apparel & Leather Products	Footwear, Footwear (sandals), Gloves, Leather, Leather Goods/Accessories	0.00359615	0.00357692
59	Sawmill products	Manufacturing	Other Manufacturing		0.00359615	0.00357692
60	Pulp and paper	Manufacturing	Other Manufacturing		0.00359615	0.00357692
61	Printing	Manufacturing	Other Manufacturing		0.00359615	0.00357692
62	Coke oven products	Manufacturing	Chemicals & Petroleum Products		0.00359615	0.00357692
63	Refined petroleum products	Manufacturing	Chemicals & Petroleum Products		0.00359615	0.00357692
64	Nitrogenous fertilizers	Manufacturing	Chemicals & Petroleum Products		0.00359615	0.00357692
65	Non-nitrogenous and mixed fertilizers	Manufacturing	Chemicals & Petroleum Products		0.00359615	0.00357692
66	Basic petrochemical products	Manufacturing	Chemicals & Petroleum Products		0.00359615	0.00357692
67	Basic inorganic chemicals	Manufacturing	Chemicals & Petroleum Products		0.00359615	0.00357692
68	Basic organic chemicals	Manufacturing	Chemicals & Petroleum Products		0.00359615	0.00357692
69	Pharmaceuticals and medicinal products	Manufacturing	Chemicals & Petroleum Products		0.00359615	0.00357692
70	Dyes, paints, glues, detergents and other chemical products	Manufacturing	Chemicals & Petroleum Products	Fireworks, Pyrotechnics, Soap	0.00359615	0.00357692
71	Rubber products	Manufacturing	Other Manufacturing	Rubber Gloves	0.00359615	0.00357692
72	Plastic products	Manufacturing	Other Manufacturing		0.00359615	0.00357692
73	Clay building materials	Manufacturing	Basic Metals & Mineral Products	Bricks, Bricks (clay)	0.00359615	0.00357692
74	Glass and other ceramics n.e.c.	Manufacturing	Basic Metals & Mineral Products	Ceramics, Glass, Glass Bangles	0.00359615	0.00357692
75	Cement, lime and plaster products	Manufacturing	Basic Metals & Mineral Products	Cement	0.00359615	0.00357692
76	Other non-metallic mineral products n.e.c.	Manufacturing	Basic Metals & Mineral Products		0.00359615	0.00357692
77	Basic iron and steel	Manufacturing	Basic Metals & Mineral Products		0.00359615	0.00357692
78	Basic aluminium	Manufacturing	Basic Metals & Mineral Products		0.00359615	0.00357692
79	Basic Copper	Manufacturing	Basic Metals & Mineral Products		0.00359615	0.00357692
80	Basic Gold	Manufacturing	Basic Metals & Mineral Products		0.00359615	0.00357692
81	Basic lead/zinc/silver	Manufacturing	Basic Metals & Mineral Products		0.00359615	0.00357692
82	Basic nickel	Manufacturing	Basic Metals & Mineral Products		0.00359615	0.00357692
83	Basic tin	Manufacturing	Basic Metals & Mineral Products		0.00359615	0.00357692
84	Basic non-ferrous metals n.e.c.	Manufacturing	Basic Metals & Mineral Products	Polysilicon	0.00359615	0.00357692
85	Fabricated metal products	Manufacturing	Machinery & Fabricated Metals	Brassware, Locks, Nails	0.00359615	0.00357692
86	Machinery and equipment	Manufacturing	Machinery & Fabricated Metals		0.00359615	0.00357692
87	Motor vehicles, trailers and semi-trailers	Manufacturing	Motor Vehicles & Transport Equipment		0.00359615	0.00357692
88	Other transport equipment	Manufacturing	Motor Vehicles & Transport Equipment		0.00359615	0.00357692
89	Repair and installation of machinery and equipment (service)	Manufacturing	Machinery & Fabricated Metals		0.00359615	0.00357692
90	Computers; electronic products; optical and precision instruments	Manufacturing	Electronics & Precision Machinery	Electronics, Surgical Instruments	0.00359615	0.00357692
91	Electrical equipment	Manufacturing	Electronics & Precision Machinery		0.00359615	0.00357692
92	Furniture and other manufacturing n.e.c	Manufacturing	Other Manufacturing	Artificial Flowers, Christmas Decorations, Fashion Accessories, Furniture, Furniture (steel), Incense (agarbatti), Matches, Soccer Balls, Toys	0.00359615	0.00357692
93	Electric power generation, transmission and distribution	Other			0.0112644	0.0308175
94	Distribution of gaseous fuels through mains	Other			0.0112644	0.0308175
95	Water collection, treatment and supply; sewerage	Other			0.0112644	0.0308175
96	Waste collection, treatment, and disposal	Other			0.0112644	0.0308175
97	Materials recovery	Other			0.0112644	0.0308175
98	Building construction	Construction			0.108	0.0285
99	Civil engineering construction	Construction			0.108	0.0285
100	Wholesale and retail trade; repair of motor vehicles and motorcycles	Services			0.0155238	0.0146667
101	Road transport	Services			0.0155238	0.0146667
102	Rail transport	Services			0.0155238	0.0146667
103	Transport via pipeline	Services			0.0155238	0.0146667
104	Water transport	Services			0.0155238	0.0146667
105	Air transport	Services			0.0155238	0.0146667
106	Services to transport	Services			0.0155238	0.0146667
107	Postal and courier services	Services			0.0155238	0.0146667
108	Hospitality	Services			0.0155238	0.0146667
109	Publishing	Services			0.0155238	0.0146667
110	Telecommunications	Services			0.0155238	0.0146667
111	Information services	Services			0.0155238	0.0146667
112	Finance and insurance	Services			0.0155238	0.0146667
113	Property and real estate	Services			0.0155238	0.0146667
114	Professional, scientific and technical services	Services			0.0155238	0.0146667
115	Administrative services	Services			0.0155238	0.0146667
116	Government; social security; defence; public order	Services			0.0155238	0.0146667
117	Education	Services			0.0155238	0.0146667
118	Human health and social work activities	Services			0.0155238	0.0146667
119	Arts, entertainment and recreation	Services		Pornography	0.0155238	0.0146667
120	Other services	Services			0.0155238	0.0146667

## Sheet: Table S3
		PIFL	FCSE	SIFL		PIFL ratio to the total FL in the same income group
		No. (in thousands)	No. (in thousands)	No. (in thousands)
High income	Male	2652.05	267.66	86.2041		0.492671
	Female	1412.95	940.34	23.7959		0.262485
Upper-middle income	Male	2929.32	543.075	1586.94		0.326714
	Female	1560.68	1907.92	438.061		0.174066
Lower-middle income	Male	4219.13	470.178	255.478		0.473262
	Female	2247.87	1651.82	70.5224		0.252144
Low income	Male	1501.19	122.087	1143.38		0.348224
	Female	799.805	428.913	315.62		0.185527
Other (world average)	Male	11303	1403	3072		0.409778
	Female	6022	4929	848		0.218321

## Sheet: Table S4
(a) Number of PIFL											unit: million people
	Services excluding domestic work	Manufacturing	Construction	Agriculture	Domestic work	Mining and quarrying	Fishery	Begging	Illicit activities	Other	Total	Total (ex. domestic, begging, illicit)
Total	5.544	3.23977	2.82397	2.13097	1.42065	0.24255	0.128	0.208	0.032	1.18707	17.325	15.6643
Male	3.68478	2.11366	2.44145	1.44678	0.45212	0.237363	0.08704	0.1872	0.016	0.346366	11.303	10.6477
Female	1.85478	1.12009	0.343254	0.680486	0.999652	0.018066	0.04096	0.0208	0.016	0.850154	6.022	4.98555
(b) Share of PIFL											unit: %
	Services excluding domestic work	Manufacturing	Construction	Agriculture	Domestic work	Mining and quarrying	Fishery	Begging	Illicit activities	Other	Total	Total (ex. domestic, begging, illicit)
Total	0.32	0.187	0.163	0.123	0.082	0.014	0.00738817	0.0120058	0.00184704	0.089759	1	0.904147
Male	0.326	0.187	0.216	0.128	0.04	0.021	0.00770061	0.016562	0.00141555	0.0563219	1	0.942022
Female	0.308	0.186	0.057	0.113	0.166	0.003	0.00680173	0.003454	0.00265692	0.154087	1	0.827889

## Sheet: Table S5
No.	Sector_names	Weight
1	Rest of Americas_Growing wheat	1
2	Rest of Americas_Growing maize	1
3	Rest of Americas_Growing cereals n.e.c	1
4	Rest of Americas_Growing leguminous crops and oil seeds	1
5	Rest of Americas_Growing rice	1
6	Rest of Americas_Growing vegetables, roots, tubers	1
7	Rest of Americas_Growing sugar beet and cane	1
8	Rest of Americas_Growing tobacco	1
9	Rest of Americas_Growing fibre crops	1
10	Rest of Americas_Growing crops n.e.c.	1
11	Rest of Americas_Growing grapes	1
12	Rest of Americas_Growing fruits and nuts	1
13	Rest of Americas_Growing beverage crops (coffee, tea etc)	1
14	Rest of Americas_Growing spices, aromatic, drug and pharmaceutical crops	1
15	Rest of Americas_Seeds and plant propagation	1
16	Rest of Americas_Raising of cattle	1
17	Rest of Americas_Raising of sheep and goats	1
18	Rest of Americas_Raising of swine/pigs	1
19	Rest of Americas_Raising of poultry	1
20	Rest of Americas_Raising of animals n.e.c.; services to agriculture	1
21	Rest of Americas_Forestry and logging	1
22	Rest of Americas_Fishing	1
23	Rest of Americas_Crustaceans and molluscs	1
24	Rest of Americas_Hard coal	1
25	Rest of Americas_Lignite and peat	1
26	Rest of Americas_Petroleum extraction	1
27	Rest of Americas_Gas extraction	1
28	Rest of Americas_Iron ores	1
29	Rest of Americas_Uranium ores	1
30	Rest of Americas_Aluminium ore	1
31	Rest of Americas_Copper ores	1
32	Rest of Americas_Gold ores	1
33	Rest of Americas_Lead/zinc/silver ores	1
34	Rest of Americas_Nickel ores	1
35	Rest of Americas_Tin ores	1
36	Rest of Americas_Other non-ferrous ores	1
37	Rest of Americas_Quarrying of stone, sand and clay	1
38	Rest of Americas_Chemical and fertilizer minerals	1
39	Rest of Americas_Extraction of salt	1
40	Rest of Americas_Mining and quarrying n.e.c.; services to mining	1
41	Rest of Americas_Beef meat	1
42	Rest of Americas_Sheep meat	1
43	Rest of Americas_Pork	1
44	Rest of Americas_Poultry meat	1
45	Rest of Americas_Other meat products	1
46	Rest of Americas_Fish products	1
47	Rest of Americas_Cereal products	1
48	Rest of Americas_Vegetable products	1
49	Rest of Americas_Fruit products	1
50	Rest of Americas_Food products and feeds n.e.c.	1
51	Rest of Americas_Sugar refining; cocoa, chocolate and confectionery	1
52	Rest of Americas_Animal oils and fats	1
53	Rest of Americas_Vegetable oils and fats	1
54	Rest of Americas_Dairy products	1
55	Rest of Americas_Alcoholic and other beverages	1
56	Rest of Americas_Tobacco products	1
57	Rest of Americas_Textiles and clothing	1
58	Rest of Americas_Leather and footwear	1
59	Rest of Americas_Sawmill products	1
60	Rest of Americas_Pulp and paper	1
61	Rest of Americas_Printing	1
62	Rest of Americas_Coke oven products	1
63	Rest of Americas_Refined petroleum products	1
64	Rest of Americas_Nitrogenous fertilizers	1
65	Rest of Americas_Non-nitrogenous and mixed fertilizers	1
66	Rest of Americas_Basic petrochemical products	1
67	Rest of Americas_Basic inorganic chemicals	1
68	Rest of Americas_Basic organic chemicals	1
69	Rest of Americas_Pharmaceuticals and medicinal products	1
70	Rest of Americas_Dyes, paints, glues, detergents and other chemical products	1
71	Rest of Americas_Rubber products	1
72	Rest of Americas_Plastic products	1
73	Rest of Americas_Clay building materials	1
74	Rest of Americas_Glass and other ceramics n.e.c.	1
75	Rest of Americas_Cement, lime and plaster products	1
76	Rest of Americas_Other non-metallic mineral products n.e.c.	1
77	Rest of Americas_Basic iron and steel	1
78	Rest of Americas_Basic aluminium	1
79	Rest of Americas_Basic Copper	1
80	Rest of Americas_Basic Gold	1
81	Rest of Americas_Basic lead/zinc/silver	1
82	Rest of Americas_Basic nickel	1
83	Rest of Americas_Basic tin	1
84	Rest of Americas_Basic non-ferrous metals n.e.c.	1
85	Rest of Americas_Fabricated metal products	1
86	Rest of Americas_Machinery and equipment	1
87	Rest of Americas_Motor vehicles, trailers and semi-trailers	1
88	Rest of Americas_Other transport equipment	1
89	Rest of Americas_Repair and installation of machinery and equipment (service)	1
90	Rest of Americas_Computers; electronic products; optical and precision instruments	1
91	Rest of Americas_Electrical equipment	1
92	Rest of Americas_Furniture and other manufacturing n.e.c	1
93	Rest of Americas_Electric power generation, transmission and distribution	1
94	Rest of Americas_Distribution of gaseous fuels through mains	1
95	Rest of Americas_Water collection, treatment and supply; sewerage	1
96	Rest of Americas_Waste collection, treatment, and disposal	1
97	Rest of Americas_Materials recovery	1
98	Rest of Americas_Building construction	1
99	Rest of Americas_Civil engineering construction	1
100	Rest of Americas_Wholesale and retail trade; repair of motor vehicles and motorcycles	1
101	Rest of Americas_Road transport	1
102	Rest of Americas_Rail transport	1
103	Rest of Americas_Transport via pipeline	1
104	Rest of Americas_Water transport	1
105	Rest of Americas_Air transport	1
106	Rest of Americas_Services to transport	1
107	Rest of Americas_Postal and courier services	1
108	Rest of Americas_Hospitality	1
109	Rest of Americas_Publishing	1
110	Rest of Americas_Telecommunications	1
111	Rest of Americas_Information services	1
112	Rest of Americas_Finance and insurance	1
113	Rest of Americas_Property and real estate	1
114	Rest of Americas_Professional, scientific and technical services	1
115	Rest of Americas_Administrative services	1
116	Rest of Americas_Government; social security; defence; public order	1
117	Rest of Americas_Education	1
118	Rest of Americas_Human health and social work activities	1
119	Rest of Americas_Arts, entertainment and recreation	1
120	Rest of Americas_Other services	1
121	Rest of Europe_Growing wheat	1
122	Rest of Europe_Growing maize	1
123	Rest of Europe_Growing cereals n.e.c	1
124	Rest of Europe_Growing leguminous crops and oil seeds	1
125	Rest of Europe_Growing rice	1
126	Rest of Europe_Growing vegetables, roots, tubers	1
127	Rest of Europe_Growing sugar beet and cane	1
128	Rest of Europe_Growing tobacco	1
129	Rest of Europe_Growing fibre crops	1
130	Rest of Europe_Growing crops n.e.c.	1
131	Rest of Europe_Growing grapes	1
132	Rest of Europe_Growing fruits and nuts	1
133	Rest of Europe_Growing beverage crops (coffee, tea etc)	1
134	Rest of Europe_Growing spices, aromatic, drug and pharmaceutical crops	1
135	Rest of Europe_Seeds and plant propagation	1
136	Rest of Europe_Raising of cattle	1
137	Rest of Europe_Raising of sheep and goats	1
138	Rest of Europe_Raising of swine/pigs	1
139	Rest of Europe_Raising of poultry	1
140	Rest of Europe_Raising of animals n.e.c.; services to agriculture	1
141	Rest of Europe_Forestry and logging	1
142	Rest of Europe_Fishing	1
143	Rest of Europe_Crustaceans and molluscs	1
144	Rest of Europe_Hard coal	1
145	Rest of Europe_Lignite and peat	1
146	Rest of Europe_Petroleum extraction	1
147	Rest of Europe_Gas extraction	1
148	Rest of Europe_Iron ores	1
149	Rest of Europe_Uranium ores	1
150	Rest of Europe_Aluminium ore	1
151	Rest of Europe_Copper ores	1
152	Rest of Europe_Gold ores	1
153	Rest of Europe_Lead/zinc/silver ores	1
154	Rest of Europe_Nickel ores	1
155	Rest of Europe_Tin ores	1
156	Rest of Europe_Other non-ferrous ores	1
157	Rest of Europe_Quarrying of stone, sand and clay	1
158	Rest of Europe_Chemical and fertilizer minerals	1
159	Rest of Europe_Extraction of salt	1
160	Rest of Europe_Mining and quarrying n.e.c.; services to mining	1
161	Rest of Europe_Beef meat	1
162	Rest of Europe_Sheep meat	1
163	Rest of Europe_Pork	1
164	Rest of Europe_Poultry meat	1
165	Rest of Europe_Other meat products	1
166	Rest of Europe_Fish products	1
167	Rest of Europe_Cereal products	1
168	Rest of Europe_Vegetable products	1
169	Rest of Europe_Fruit products	1
170	Rest of Europe_Food products and feeds n.e.c.	1
171	Rest of Europe_Sugar refining; cocoa, chocolate and confectionery	1
172	Rest of Europe_Animal oils and fats	1
173	Rest of Europe_Vegetable oils and fats	1
174	Rest of Europe_Dairy products	1
175	Rest of Europe_Alcoholic and other beverages	1
176	Rest of Europe_Tobacco products	1
177	Rest of Europe_Textiles and clothing	1
178	Rest of Europe_Leather and footwear	1
179	Rest of Europe_Sawmill products	1
180	Rest of Europe_Pulp and paper	1
181	Rest of Europe_Printing	1
182	Rest of Europe_Coke oven products	1
183	Rest of Europe_Refined petroleum products	1
184	Rest of Europe_Nitrogenous fertilizers	1
185	Rest of Europe_Non-nitrogenous and mixed fertilizers	1
186	Rest of Europe_Basic petrochemical products	1
187	Rest of Europe_Basic inorganic chemicals	1
188	Rest of Europe_Basic organic chemicals	1
189	Rest of Europe_Pharmaceuticals and medicinal products	1
190	Rest of Europe_Dyes, paints, glues, detergents and other chemical products	1
191	Rest of Europe_Rubber products	1
192	Rest of Europe_Plastic products	1
193	Rest of Europe_Clay building materials	1
194	Rest of Europe_Glass and other ceramics n.e.c.	1
195	Rest of Europe_Cement, lime and plaster products	1
196	Rest of Europe_Other non-metallic mineral products n.e.c.	1
197	Rest of Europe_Basic iron and steel	1
198	Rest of Europe_Basic aluminium	1
199	Rest of Europe_Basic Copper	1
200	Rest of Europe_Basic Gold	1
201	Rest of Europe_Basic lead/zinc/silver	1
202	Rest of Europe_Basic nickel	1
203	Rest of Europe_Basic tin	1
204	Rest of Europe_Basic non-ferrous metals n.e.c.	1
205	Rest of Europe_Fabricated metal products	1
206	Rest of Europe_Machinery and equipment	1
207	Rest of Europe_Motor vehicles, trailers and semi-trailers	1
208	Rest of Europe_Other transport equipment	1
209	Rest of Europe_Repair and installation of machinery and equipment (service)	1
210	Rest of Europe_Computers; electronic products; optical and precision instruments	1
211	Rest of Europe_Electrical equipment	1
212	Rest of Europe_Furniture and other manufacturing n.e.c	1
213	Rest of Europe_Electric power generation, transmission and distribution	1
214	Rest of Europe_Distribution of gaseous fuels through mains	1
215	Rest of Europe_Water collection, treatment and supply; sewerage	1
216	Rest of Europe_Waste collection, treatment, and disposal	1
217	Rest of Europe_Materials recovery	1
218	Rest of Europe_Building construction	1
219	Rest of Europe_Civil engineering construction	1
220	Rest of Europe_Wholesale and retail trade; repair of motor vehicles and motorcycles	1
221	Rest of Europe_Road transport	1
222	Rest of Europe_Rail transport	1
223	Rest of Europe_Transport via pipeline	1
224	Rest of Europe_Water transport	1
225	Rest of Europe_Air transport	1
226	Rest of Europe_Services to transport	1
227	Rest of Europe_Postal and courier services	1
228	Rest of Europe_Hospitality	1
229	Rest of Europe_Publishing	1
230	Rest of Europe_Telecommunications	1
231	Rest of Europe_Information services	1
232	Rest of Europe_Finance and insurance	1
233	Rest of Europe_Property and real estate	1
234	Rest of Europe_Professional, scientific and technical services	1
235	Rest of Europe_Administrative services	1
236	Rest of Europe_Government; social security; defence; public order	1
237	Rest of Europe_Education	1
238	Rest of Europe_Human health and social work activities	1
239	Rest of Europe_Arts, entertainment and recreation	1
240	Rest of Europe_Other services	1
241	Rest of Africa_Growing wheat	1
242	Rest of Africa_Growing maize	1
243	Rest of Africa_Growing cereals n.e.c	1
244	Rest of Africa_Growing leguminous crops and oil seeds	1
245	Rest of Africa_Growing rice	1
246	Rest of Africa_Growing vegetables, roots, tubers	1
247	Rest of Africa_Growing sugar beet and cane	1
248	Rest of Africa_Growing tobacco	1
249	Rest of Africa_Growing fibre crops	1
250	Rest of Africa_Growing crops n.e.c.	1
251	Rest of Africa_Growing grapes	1
252	Rest of Africa_Growing fruits and nuts	1
253	Rest of Africa_Growing beverage crops (coffee, tea etc)	1
254	Rest of Africa_Growing spices, aromatic, drug and pharmaceutical crops	1
255	Rest of Africa_Seeds and plant propagation	1
256	Rest of Africa_Raising of cattle	1
257	Rest of Africa_Raising of sheep and goats	1
258	Rest of Africa_Raising of swine/pigs	1
259	Rest of Africa_Raising of poultry	1
260	Rest of Africa_Raising of animals n.e.c.; services to agriculture	1
261	Rest of Africa_Forestry and logging	1
262	Rest of Africa_Fishing	1
263	Rest of Africa_Crustaceans and molluscs	1
264	Rest of Africa_Hard coal	1
265	Rest of Africa_Lignite and peat	1
266	Rest of Africa_Petroleum extraction	1
267	Rest of Africa_Gas extraction	1
268	Rest of Africa_Iron ores	1
269	Rest of Africa_Uranium ores	1
270	Rest of Africa_Aluminium ore	1
271	Rest of Africa_Copper ores	1
272	Rest of Africa_Gold ores	1
273	Rest of Africa_Lead/zinc/silver ores	1
274	Rest of Africa_Nickel ores	1
275	Rest of Africa_Tin ores	1
276	Rest of Africa_Other non-ferrous ores	1
277	Rest of Africa_Quarrying of stone, sand and clay	1
278	Rest of Africa_Chemical and fertilizer minerals	1
279	Rest of Africa_Extraction of salt	1
280	Rest of Africa_Mining and quarrying n.e.c.; services to mining	1
281	Rest of Africa_Beef meat	1
282	Rest of Africa_Sheep meat	1
283	Rest of Africa_Pork	1
284	Rest of Africa_Poultry meat	1
285	Rest of Africa_Other meat products	1
286	Rest of Africa_Fish products	1
287	Rest of Africa_Cereal products	1
288	Rest of Africa_Vegetable products	1
289	Rest of Africa_Fruit products	1
290	Rest of Africa_Food products and feeds n.e.c.	1
291	Rest of Africa_Sugar refining; cocoa, chocolate and confectionery	1
292	Rest of Africa_Animal oils and fats	1
293	Rest of Africa_Vegetable oils and fats	1
294	Rest of Africa_Dairy products	1
295	Rest of Africa_Alcoholic and other beverages	1
296	Rest of Africa_Tobacco products	1
297	Rest of Africa_Textiles and clothing	1
298	Rest of Africa_Leather and footwear	1
299	Rest of Africa_Sawmill products	1
300	Rest of Africa_Pulp and paper	1
301	Rest of Africa_Printing	1
302	Rest of Africa_Coke oven products	1
303	Rest of Africa_Refined petroleum products	1
304	Rest of Africa_Nitrogenous fertilizers	1
305	Rest of Africa_Non-nitrogenous and mixed fertilizers	1
306	Rest of Africa_Basic petrochemical products	1
307	Rest of Africa_Basic inorganic chemicals	1
308	Rest of Africa_Basic organic chemicals	1
309	Rest of Africa_Pharmaceuticals and medicinal products	1
310	Rest of Africa_Dyes, paints, glues, detergents and other chemical products	1
311	Rest of Africa_Rubber products	1
312	Rest of Africa_Plastic products	1
313	Rest of Africa_Clay building materials	1
314	Rest of Africa_Glass and other ceramics n.e.c.	1
315	Rest of Africa_Cement, lime and plaster products	1
316	Rest of Africa_Other non-metallic mineral products n.e.c.	1
317	Rest of Africa_Basic iron and steel	1
318	Rest of Africa_Basic aluminium	1
319	Rest of Africa_Basic Copper	1
320	Rest of Africa_Basic Gold	1
321	Rest of Africa_Basic lead/zinc/silver	1
322	Rest of Africa_Basic nickel	1
323	Rest of Africa_Basic tin	1
324	Rest of Africa_Basic non-ferrous metals n.e.c.	1
325	Rest of Africa_Fabricated metal products	1
326	Rest of Africa_Machinery and equipment	1
327	Rest of Africa_Motor vehicles, trailers and semi-trailers	1
328	Rest of Africa_Other transport equipment	1
329	Rest of Africa_Repair and installation of machinery and equipment (service)	1
330	Rest of Africa_Computers; electronic products; optical and precision instruments	1
331	Rest of Africa_Electrical equipment	1
332	Rest of Africa_Furniture and other manufacturing n.e.c	1
333	Rest of Africa_Electric power generation, transmission and distribution	1
334	Rest of Africa_Distribution of gaseous fuels through mains	1
335	Rest of Africa_Water collection, treatment and supply; sewerage	1
336	Rest of Africa_Waste collection, treatment, and disposal	1
337	Rest of Africa_Materials recovery	1
338	Rest of Africa_Building construction	1
339	Rest of Africa_Civil engineering construction	1
340	Rest of Africa_Wholesale and retail trade; repair of motor vehicles and motorcycles	1
341	Rest of Africa_Road transport	1
342	Rest of Africa_Rail transport	1
343	Rest of Africa_Transport via pipeline	1
344	Rest of Africa_Water transport	1
345	Rest of Africa_Air transport	1
346	Rest of Africa_Services to transport	1
347	Rest of Africa_Postal and courier services	1
348	Rest of Africa_Hospitality	1
349	Rest of Africa_Publishing	1
350	Rest of Africa_Telecommunications	1
351	Rest of Africa_Information services	1
352	Rest of Africa_Finance and insurance	1
353	Rest of Africa_Property and real estate	1
354	Rest of Africa_Professional, scientific and technical services	1
355	Rest of Africa_Administrative services	1
356	Rest of Africa_Government; social security; defence; public order	1
357	Rest of Africa_Education	1
358	Rest of Africa_Human health and social work activities	1
359	Rest of Africa_Arts, entertainment and recreation	1
360	Rest of Africa_Other services	1
361	Rest of Asia-Pacific_Growing wheat	1
362	Rest of Asia-Pacific_Growing maize	1
363	Rest of Asia-Pacific_Growing cereals n.e.c	1
364	Rest of Asia-Pacific_Growing leguminous crops and oil seeds	1
365	Rest of Asia-Pacific_Growing rice	1
366	Rest of Asia-Pacific_Growing vegetables, roots, tubers	1
367	Rest of Asia-Pacific_Growing sugar beet and cane	1
368	Rest of Asia-Pacific_Growing tobacco	1
369	Rest of Asia-Pacific_Growing fibre crops	1
370	Rest of Asia-Pacific_Growing crops n.e.c.	1
371	Rest of Asia-Pacific_Growing grapes	1
372	Rest of Asia-Pacific_Growing fruits and nuts	1
373	Rest of Asia-Pacific_Growing beverage crops (coffee, tea etc)	1
374	Rest of Asia-Pacific_Growing spices, aromatic, drug and pharmaceutical crops	1
375	Rest of Asia-Pacific_Seeds and plant propagation	1
376	Rest of Asia-Pacific_Raising of cattle	1
377	Rest of Asia-Pacific_Raising of sheep and goats	1
378	Rest of Asia-Pacific_Raising of swine/pigs	1
379	Rest of Asia-Pacific_Raising of poultry	1
380	Rest of Asia-Pacific_Raising of animals n.e.c.; services to agriculture	1
381	Rest of Asia-Pacific_Forestry and logging	1
382	Rest of Asia-Pacific_Fishing	5
383	Rest of Asia-Pacific_Crustaceans and molluscs	1
384	Rest of Asia-Pacific_Hard coal	1
385	Rest of Asia-Pacific_Lignite and peat	1
386	Rest of Asia-Pacific_Petroleum extraction	1
387	Rest of Asia-Pacific_Gas extraction	1
388	Rest of Asia-Pacific_Iron ores	1
389	Rest of Asia-Pacific_Uranium ores	1
390	Rest of Asia-Pacific_Aluminium ore	1
391	Rest of Asia-Pacific_Copper ores	1
392	Rest of Asia-Pacific_Gold ores	1
393	Rest of Asia-Pacific_Lead/zinc/silver ores	1
394	Rest of Asia-Pacific_Nickel ores	1
395	Rest of Asia-Pacific_Tin ores	1
396	Rest of Asia-Pacific_Other non-ferrous ores	1
397	Rest of Asia-Pacific_Quarrying of stone, sand and clay	1
398	Rest of Asia-Pacific_Chemical and fertilizer minerals	1
399	Rest of Asia-Pacific_Extraction of salt	1
400	Rest of Asia-Pacific_Mining and quarrying n.e.c.; services to mining	1
401	Rest of Asia-Pacific_Beef meat	1
402	Rest of Asia-Pacific_Sheep meat	1
403	Rest of Asia-Pacific_Pork	1
404	Rest of Asia-Pacific_Poultry meat	1
405	Rest of Asia-Pacific_Other meat products	1
406	Rest of Asia-Pacific_Fish products	1
407	Rest of Asia-Pacific_Cereal products	1
408	Rest of Asia-Pacific_Vegetable products	1
409	Rest of Asia-Pacific_Fruit products	1
410	Rest of Asia-Pacific_Food products and feeds n.e.c.	1
411	Rest of Asia-Pacific_Sugar refining; cocoa, chocolate and confectionery	1
412	Rest of Asia-Pacific_Animal oils and fats	1
413	Rest of Asia-Pacific_Vegetable oils and fats	1
414	Rest of Asia-Pacific_Dairy products	1
415	Rest of Asia-Pacific_Alcoholic and other beverages	1
416	Rest of Asia-Pacific_Tobacco products	1
417	Rest of Asia-Pacific_Textiles and clothing	1
418	Rest of Asia-Pacific_Leather and footwear	1
419	Rest of Asia-Pacific_Sawmill products	1
420	Rest of Asia-Pacific_Pulp and paper	1
421	Rest of Asia-Pacific_Printing	1
422	Rest of Asia-Pacific_Coke oven products	1
423	Rest of Asia-Pacific_Refined petroleum products	1
424	Rest of Asia-Pacific_Nitrogenous fertilizers	1
425	Rest of Asia-Pacific_Non-nitrogenous and mixed fertilizers	1
426	Rest of Asia-Pacific_Basic petrochemical products	1
427	Rest of Asia-Pacific_Basic inorganic chemicals	1
428	Rest of Asia-Pacific_Basic organic chemicals	1
429	Rest of Asia-Pacific_Pharmaceuticals and medicinal products	1
430	Rest of Asia-Pacific_Dyes, paints, glues, detergents and other chemical products	1
431	Rest of Asia-Pacific_Rubber products	1
432	Rest of Asia-Pacific_Plastic products	1
433	Rest of Asia-Pacific_Clay building materials	1
434	Rest of Asia-Pacific_Glass and other ceramics n.e.c.	1
435	Rest of Asia-Pacific_Cement, lime and plaster products	1
436	Rest of Asia-Pacific_Other non-metallic mineral products n.e.c.	1
437	Rest of Asia-Pacific_Basic iron and steel	1
438	Rest of Asia-Pacific_Basic aluminium	1
439	Rest of Asia-Pacific_Basic Copper	1
440	Rest of Asia-Pacific_Basic Gold	1
441	Rest of Asia-Pacific_Basic lead/zinc/silver	1
442	Rest of Asia-Pacific_Basic nickel	1
443	Rest of Asia-Pacific_Basic tin	1
444	Rest of Asia-Pacific_Basic non-ferrous metals n.e.c.	1
445	Rest of Asia-Pacific_Fabricated metal products	1
446	Rest of Asia-Pacific_Machinery and equipment	1
447	Rest of Asia-Pacific_Motor vehicles, trailers and semi-trailers	1
448	Rest of Asia-Pacific_Other transport equipment	1
449	Rest of Asia-Pacific_Repair and installation of machinery and equipment (service)	1
450	Rest of Asia-Pacific_Computers; electronic products; optical and precision instruments	1
451	Rest of Asia-Pacific_Electrical equipment	1
452	Rest of Asia-Pacific_Furniture and other manufacturing n.e.c	1
453	Rest of Asia-Pacific_Electric power generation, transmission and distribution	1
454	Rest of Asia-Pacific_Distribution of gaseous fuels through mains	1
455	Rest of Asia-Pacific_Water collection, treatment and supply; sewerage	1
456	Rest of Asia-Pacific_Waste collection, treatment, and disposal	1
457	Rest of Asia-Pacific_Materials recovery	1
458	Rest of Asia-Pacific_Building construction	1
459	Rest of Asia-Pacific_Civil engineering construction	1
460	Rest of Asia-Pacific_Wholesale and retail trade; repair of motor vehicles and motorcycles	1
461	Rest of Asia-Pacific_Road transport	1
462	Rest of Asia-Pacific_Rail transport	1
463	Rest of Asia-Pacific_Transport via pipeline	1
464	Rest of Asia-Pacific_Water transport	1
465	Rest of Asia-Pacific_Air transport	1
466	Rest of Asia-Pacific_Services to transport	1
467	Rest of Asia-Pacific_Postal and courier services	1
468	Rest of Asia-Pacific_Hospitality	1
469	Rest of Asia-Pacific_Publishing	1
470	Rest of Asia-Pacific_Telecommunications	1
471	Rest of Asia-Pacific_Information services	1
472	Rest of Asia-Pacific_Finance and insurance	1
473	Rest of Asia-Pacific_Property and real estate	1
474	Rest of Asia-Pacific_Professional, scientific and technical services	1
475	Rest of Asia-Pacific_Administrative services	1
476	Rest of Asia-Pacific_Government; social security; defence; public order	1
477	Rest of Asia-Pacific_Education	1
478	Rest of Asia-Pacific_Human health and social work activities	1
479	Rest of Asia-Pacific_Arts, entertainment and recreation	1
480	Rest of Asia-Pacific_Other services	1
481	Afghanistan_Growing wheat	1
482	Afghanistan_Growing maize	1
483	Afghanistan_Growing cereals n.e.c	1
484	Afghanistan_Growing leguminous crops and oil seeds	1
485	Afghanistan_Growing rice	1
486	Afghanistan_Growing vegetables, roots, tubers	1
487	Afghanistan_Growing sugar beet and cane	1
488	Afghanistan_Growing tobacco	1
489	Afghanistan_Growing fibre crops	1
490	Afghanistan_Growing crops n.e.c.	1
491	Afghanistan_Growing grapes	1
492	Afghanistan_Growing fruits and nuts	1
493	Afghanistan_Growing beverage crops (coffee, tea etc)	1
494	Afghanistan_Growing spices, aromatic, drug and pharmaceutical crops	1
495	Afghanistan_Seeds and plant propagation	1
496	Afghanistan_Raising of cattle	1
497	Afghanistan_Raising of sheep and goats	1
498	Afghanistan_Raising of swine/pigs	1
499	Afghanistan_Raising of poultry	1
500	Afghanistan_Raising of animals n.e.c.; services to agriculture	1
501	Afghanistan_Forestry and logging	1
502	Afghanistan_Fishing	1
503	Afghanistan_Crustaceans and molluscs	1
504	Afghanistan_Hard coal	1
505	Afghanistan_Lignite and peat	1
506	Afghanistan_Petroleum extraction	1
507	Afghanistan_Gas extraction	1
508	Afghanistan_Iron ores	1
509	Afghanistan_Uranium ores	1
510	Afghanistan_Aluminium ore	1
511	Afghanistan_Copper ores	1
512	Afghanistan_Gold ores	1
513	Afghanistan_Lead/zinc/silver ores	1
514	Afghanistan_Nickel ores	1
515	Afghanistan_Tin ores	1
516	Afghanistan_Other non-ferrous ores	1
517	Afghanistan_Quarrying of stone, sand and clay	1
518	Afghanistan_Chemical and fertilizer minerals	1
519	Afghanistan_Extraction of salt	1
520	Afghanistan_Mining and quarrying n.e.c.; services to mining	1
521	Afghanistan_Beef meat	1
522	Afghanistan_Sheep meat	1
523	Afghanistan_Pork	1
524	Afghanistan_Poultry meat	1
525	Afghanistan_Other meat products	1
526	Afghanistan_Fish products	1
527	Afghanistan_Cereal products	1
528	Afghanistan_Vegetable products	1
529	Afghanistan_Fruit products	1
530	Afghanistan_Food products and feeds n.e.c.	1
531	Afghanistan_Sugar refining; cocoa, chocolate and confectionery	1
532	Afghanistan_Animal oils and fats	1
533	Afghanistan_Vegetable oils and fats	1
534	Afghanistan_Dairy products	1
535	Afghanistan_Alcoholic and other beverages	1
536	Afghanistan_Tobacco products	1
537	Afghanistan_Textiles and clothing	1
538	Afghanistan_Leather and footwear	1
539	Afghanistan_Sawmill products	1
540	Afghanistan_Pulp and paper	1
541	Afghanistan_Printing	1
542	Afghanistan_Coke oven products	1
543	Afghanistan_Refined petroleum products	1
544	Afghanistan_Nitrogenous fertilizers	1
545	Afghanistan_Non-nitrogenous and mixed fertilizers	1
546	Afghanistan_Basic petrochemical products	1
547	Afghanistan_Basic inorganic chemicals	1
548	Afghanistan_Basic organic chemicals	1
549	Afghanistan_Pharmaceuticals and medicinal products	1
550	Afghanistan_Dyes, paints, glues, detergents and other chemical products	1
551	Afghanistan_Rubber products	1
552	Afghanistan_Plastic products	1
553	Afghanistan_Clay building materials	5
554	Afghanistan_Glass and other ceramics n.e.c.	1
555	Afghanistan_Cement, lime and plaster products	1
556	Afghanistan_Other non-metallic mineral products n.e.c.	1
557	Afghanistan_Basic iron and steel	1
558	Afghanistan_Basic aluminium	1
559	Afghanistan_Basic Copper	1
560	Afghanistan_Basic Gold	1
561	Afghanistan_Basic lead/zinc/silver	1
562	Afghanistan_Basic nickel	1
563	Afghanistan_Basic tin	1
564	Afghanistan_Basic non-ferrous metals n.e.c.	1
565	Afghanistan_Fabricated metal products	1
566	Afghanistan_Machinery and equipment	1
567	Afghanistan_Motor vehicles, trailers and semi-trailers	1
568	Afghanistan_Other transport equipment	1
569	Afghanistan_Repair and installation of machinery and equipment (service)	1
570	Afghanistan_Computers; electronic products; optical and precision instruments	1
571	Afghanistan_Electrical equipment	1
572	Afghanistan_Furniture and other manufacturing n.e.c	1
573	Afghanistan_Electric power generation, transmission and distribution	1
574	Afghanistan_Distribution of gaseous fuels through mains	1
575	Afghanistan_Water collection, treatment and supply; sewerage	1
576	Afghanistan_Waste collection, treatment, and disposal	1
577	Afghanistan_Materials recovery	1
578	Afghanistan_Building construction	1
579	Afghanistan_Civil engineering construction	1
580	Afghanistan_Wholesale and retail trade; repair of motor vehicles and motorcycles	1
581	Afghanistan_Road transport	1
582	Afghanistan_Rail transport	1
583	Afghanistan_Transport via pipeline	1
584	Afghanistan_Water transport	1
585	Afghanistan_Air transport	1
586	Afghanistan_Services to transport	1
587	Afghanistan_Postal and courier services	1
588	Afghanistan_Hospitality	1
589	Afghanistan_Publishing	1
590	Afghanistan_Telecommunications	1
591	Afghanistan_Information services	1
592	Afghanistan_Finance and insurance	1
593	Afghanistan_Property and real estate	1
594	Afghanistan_Professional, scientific and technical services	1
595	Afghanistan_Administrative services	1
596	Afghanistan_Government; social security; defence; public order	1
597	Afghanistan_Education	1
598	Afghanistan_Human health and social work activities	1
599	Afghanistan_Arts, entertainment and recreation	1
600	Afghanistan_Other services	1
601	Angola_Growing wheat	1
602	Angola_Growing maize	1
603	Angola_Growing cereals n.e.c	1
604	Angola_Growing leguminous crops and oil seeds	1
605	Angola_Growing rice	1
606	Angola_Growing vegetables, roots, tubers	1
607	Angola_Growing sugar beet and cane	1
608	Angola_Growing tobacco	1
609	Angola_Growing fibre crops	1
610	Angola_Growing crops n.e.c.	1
611	Angola_Growing grapes	1
612	Angola_Growing fruits and nuts	1
613	Angola_Growing beverage crops (coffee, tea etc)	1
614	Angola_Growing spices, aromatic, drug and pharmaceutical crops	1
615	Angola_Seeds and plant propagation	1
616	Angola_Raising of cattle	1
617	Angola_Raising of sheep and goats	1
618	Angola_Raising of swine/pigs	1
619	Angola_Raising of poultry	1
620	Angola_Raising of animals n.e.c.; services to agriculture	1
621	Angola_Forestry and logging	1
622	Angola_Fishing	1
623	Angola_Crustaceans and molluscs	1
624	Angola_Hard coal	1
625	Angola_Lignite and peat	1
626	Angola_Petroleum extraction	1
627	Angola_Gas extraction	1
628	Angola_Iron ores	1
629	Angola_Uranium ores	1
630	Angola_Aluminium ore	1
631	Angola_Copper ores	1
632	Angola_Gold ores	1
633	Angola_Lead/zinc/silver ores	1
634	Angola_Nickel ores	1
635	Angola_Tin ores	1
636	Angola_Other non-ferrous ores	1
637	Angola_Quarrying of stone, sand and clay	1
638	Angola_Chemical and fertilizer minerals	1
639	Angola_Extraction of salt	1
640	Angola_Mining and quarrying n.e.c.; services to mining	5
641	Angola_Beef meat	1
642	Angola_Sheep meat	1
643	Angola_Pork	1
644	Angola_Poultry meat	1
645	Angola_Other meat products	1
646	Angola_Fish products	1
647	Angola_Cereal products	1
648	Angola_Vegetable products	1
649	Angola_Fruit products	1
650	Angola_Food products and feeds n.e.c.	1
651	Angola_Sugar refining; cocoa, chocolate and confectionery	1
652	Angola_Animal oils and fats	1
653	Angola_Vegetable oils and fats	1
654	Angola_Dairy products	1
655	Angola_Alcoholic and other beverages	1
656	Angola_Tobacco products	1
657	Angola_Textiles and clothing	1
658	Angola_Leather and footwear	1
659	Angola_Sawmill products	1
660	Angola_Pulp and paper	1
661	Angola_Printing	1
662	Angola_Coke oven products	1
663	Angola_Refined petroleum products	1
664	Angola_Nitrogenous fertilizers	1
665	Angola_Non-nitrogenous and mixed fertilizers	1
666	Angola_Basic petrochemical products	1
667	Angola_Basic inorganic chemicals	1
668	Angola_Basic organic chemicals	1
669	Angola_Pharmaceuticals and medicinal products	1
670	Angola_Dyes, paints, glues, detergents and other chemical products	1
671	Angola_Rubber products	1
672	Angola_Plastic products	1
673	Angola_Clay building materials	1
674	Angola_Glass and other ceramics n.e.c.	1
675	Angola_Cement, lime and plaster products	1
676	Angola_Other non-metallic mineral products n.e.c.	1
677	Angola_Basic iron and steel	1
678	Angola_Basic aluminium	1
679	Angola_Basic Copper	1
680	Angola_Basic Gold	1
681	Angola_Basic lead/zinc/silver	1
682	Angola_Basic nickel	1
683	Angola_Basic tin	1
684	Angola_Basic non-ferrous metals n.e.c.	1
685	Angola_Fabricated metal products	1
686	Angola_Machinery and equipment	1
687	Angola_Motor vehicles, trailers and semi-trailers	1
688	Angola_Other transport equipment	1
689	Angola_Repair and installation of machinery and equipment (service)	1
690	Angola_Computers; electronic products; optical and precision instruments	1
691	Angola_Electrical equipment	1
692	Angola_Furniture and other manufacturing n.e.c	1
693	Angola_Electric power generation, transmission and distribution	1
694	Angola_Distribution of gaseous fuels through mains	1
695	Angola_Water collection, treatment and supply; sewerage	1
696	Angola_Waste collection, treatment, and disposal	1
697	Angola_Materials recovery	1
698	Angola_Building construction	1
699	Angola_Civil engineering construction	1
700	Angola_Wholesale and retail trade; repair of motor vehicles and motorcycles	1
701	Angola_Road transport	1
702	Angola_Rail transport	1
703	Angola_Transport via pipeline	1
704	Angola_Water transport	1
705	Angola_Air transport	1
706	Angola_Services to transport	1
707	Angola_Postal and courier services	1
708	Angola_Hospitality	1
709	Angola_Publishing	1
710	Angola_Telecommunications	1
711	Angola_Information services	1
712	Angola_Finance and insurance	1
713	Angola_Property and real estate	1
714	Angola_Professional, scientific and technical services	1
715	Angola_Administrative services	1
716	Angola_Government; social security; defence; public order	1
717	Angola_Education	1
718	Angola_Human health and social work activities	1
719	Angola_Arts, entertainment and recreation	1
720	Angola_Other services	1
721	Albania_Growing wheat	1
722	Albania_Growing maize	1
723	Albania_Growing cereals n.e.c	1
724	Albania_Growing leguminous crops and oil seeds	1
725	Albania_Growing rice	1
726	Albania_Growing vegetables, roots, tubers	1
727	Albania_Growing sugar beet and cane	1
728	Albania_Growing tobacco	1
729	Albania_Growing fibre crops	1
730	Albania_Growing crops n.e.c.	1
731	Albania_Growing grapes	1
732	Albania_Growing fruits and nuts	1
733	Albania_Growing beverage crops (coffee, tea etc)	1
734	Albania_Growing spices, aromatic, drug and pharmaceutical crops	1
735	Albania_Seeds and plant propagation	1
736	Albania_Raising of cattle	1
737	Albania_Raising of sheep and goats	1
738	Albania_Raising of swine/pigs	1
739	Albania_Raising of poultry	1
740	Albania_Raising of animals n.e.c.; services to agriculture	1
741	Albania_Forestry and logging	1
742	Albania_Fishing	1
743	Albania_Crustaceans and molluscs	1
744	Albania_Hard coal	1
745	Albania_Lignite and peat	1
746	Albania_Petroleum extraction	1
747	Albania_Gas extraction	1
748	Albania_Iron ores	1
749	Albania_Uranium ores	1
750	Albania_Aluminium ore	1
751	Albania_Copper ores	1
752	Albania_Gold ores	1
753	Albania_Lead/zinc/silver ores	1
754	Albania_Nickel ores	1
755	Albania_Tin ores	1
756	Albania_Other non-ferrous ores	1
757	Albania_Quarrying of stone, sand and clay	1
758	Albania_Chemical and fertilizer minerals	1
759	Albania_Extraction of salt	1
760	Albania_Mining and quarrying n.e.c.; services to mining	1
761	Albania_Beef meat	1
762	Albania_Sheep meat	1
763	Albania_Pork	1
764	Albania_Poultry meat	1
765	Albania_Other meat products	1
766	Albania_Fish products	1
767	Albania_Cereal products	1
768	Albania_Vegetable products	1
769	Albania_Fruit products	1
770	Albania_Food products and feeds n.e.c.	1
771	Albania_Sugar refining; cocoa, chocolate and confectionery	1
772	Albania_Animal oils and fats	1
773	Albania_Vegetable oils and fats	1
774	Albania_Dairy products	1
775	Albania_Alcoholic and other beverages	1
776	Albania_Tobacco products	1
777	Albania_Textiles and clothing	1
778	Albania_Leather and footwear	1
779	Albania_Sawmill products	1
780	Albania_Pulp and paper	1
781	Albania_Printing	1
782	Albania_Coke oven products	1
783	Albania_Refined petroleum products	1
784	Albania_Nitrogenous fertilizers	1
785	Albania_Non-nitrogenous and mixed fertilizers	1
786	Albania_Basic petrochemical products	1
787	Albania_Basic inorganic chemicals	1
788	Albania_Basic organic chemicals	1
789	Albania_Pharmaceuticals and medicinal products	1
790	Albania_Dyes, paints, glues, detergents and other chemical products	1
791	Albania_Rubber products	1
792	Albania_Plastic products	1
793	Albania_Clay building materials	1
794	Albania_Glass and other ceramics n.e.c.	1
795	Albania_Cement, lime and plaster products	1
796	Albania_Other non-metallic mineral products n.e.c.	1
797	Albania_Basic iron and steel	1
798	Albania_Basic aluminium	1
799	Albania_Basic Copper	1
800	Albania_Basic Gold	1
801	Albania_Basic lead/zinc/silver	1
802	Albania_Basic nickel	1
803	Albania_Basic tin	1
804	Albania_Basic non-ferrous metals n.e.c.	1
805	Albania_Fabricated metal products	1
806	Albania_Machinery and equipment	1
807	Albania_Motor vehicles, trailers and semi-trailers	1
808	Albania_Other transport equipment	1
809	Albania_Repair and installation of machinery and equipment (service)	1
810	Albania_Computers; electronic products; optical and precision instruments	1
811	Albania_Electrical equipment	1
812	Albania_Furniture and other manufacturing n.e.c	1
813	Albania_Electric power generation, transmission and distribution	1
814	Albania_Distribution of gaseous fuels through mains	1
815	Albania_Water collection, treatment and supply; sewerage	1
816	Albania_Waste collection, treatment, and disposal	1
817	Albania_Materials recovery	1
818	Albania_Building construction	1
819	Albania_Civil engineering construction	1
820	Albania_Wholesale and retail trade; repair of motor vehicles and motorcycles	1
821	Albania_Road transport	1
822	Albania_Rail transport	1
823	Albania_Transport via pipeline	1
824	Albania_Water transport	1
825	Albania_Air transport	1
826	Albania_Services to transport	1
827	Albania_Postal and courier services	1
828	Albania_Hospitality	1
829	Albania_Publishing	1
830	Albania_Telecommunications	1
831	Albania_Information services	1
832	Albania_Finance and insurance	1
833	Albania_Property and real estate	1
834	Albania_Professional, scientific and technical services	1
835	Albania_Administrative services	1
836	Albania_Government; social security; defence; public order	1
837	Albania_Education	1
838	Albania_Human health and social work activities	1
839	Albania_Arts, entertainment and recreation	1
840	Albania_Other services	1
841	United Arab Emirates_Growing wheat	1
842	United Arab Emirates_Growing maize	1
843	United Arab Emirates_Growing cereals n.e.c	1
844	United Arab Emirates_Growing leguminous crops and oil seeds	1
845	United Arab Emirates_Growing rice	1
846	United Arab Emirates_Growing vegetables, roots, tubers	1
847	United Arab Emirates_Growing sugar beet and cane	1
848	United Arab Emirates_Growing tobacco	1
849	United Arab Emirates_Growing fibre crops	1
850	United Arab Emirates_Growing crops n.e.c.	1
851	United Arab Emirates_Growing grapes	1
852	United Arab Emirates_Growing fruits and nuts	1
853	United Arab Emirates_Growing beverage crops (coffee, tea etc)	1
854	United Arab Emirates_Growing spices, aromatic, drug and pharmaceutical crops	1
855	United Arab Emirates_Seeds and plant propagation	1
856	United Arab Emirates_Raising of cattle	1
857	United Arab Emirates_Raising of sheep and goats	1
858	United Arab Emirates_Raising of swine/pigs	1
859	United Arab Emirates_Raising of poultry	1
860	United Arab Emirates_Raising of animals n.e.c.; services to agriculture	1
861	United Arab Emirates_Forestry and logging	1
862	United Arab Emirates_Fishing	1
863	United Arab Emirates_Crustaceans and molluscs	1
864	United Arab Emirates_Hard coal	1
865	United Arab Emirates_Lignite and peat	1
866	United Arab Emirates_Petroleum extraction	1
867	United Arab Emirates_Gas extraction	1
868	United Arab Emirates_Iron ores	1
869	United Arab Emirates_Uranium ores	1
870	United Arab Emirates_Aluminium ore	1
871	United Arab Emirates_Copper ores	1
872	United Arab Emirates_Gold ores	1
873	United Arab Emirates_Lead/zinc/silver ores	1
874	United Arab Emirates_Nickel ores	1
875	United Arab Emirates_Tin ores	1
876	United Arab Emirates_Other non-ferrous ores	1
877	United Arab Emirates_Quarrying of stone, sand and clay	1
878	United Arab Emirates_Chemical and fertilizer minerals	1
879	United Arab Emirates_Extraction of salt	1
880	United Arab Emirates_Mining and quarrying n.e.c.; services to mining	1
881	United Arab Emirates_Beef meat	1
882	United Arab Emirates_Sheep meat	1
883	United Arab Emirates_Pork	1
884	United Arab Emirates_Poultry meat	1
885	United Arab Emirates_Other meat products	1
886	United Arab Emirates_Fish products	1
887	United Arab Emirates_Cereal products	1
888	United Arab Emirates_Vegetable products	1
889	United Arab Emirates_Fruit products	1
890	United Arab Emirates_Food products and feeds n.e.c.	1
891	United Arab Emirates_Sugar refining; cocoa, chocolate and confectionery	1
892	United Arab Emirates_Animal oils and fats	1
893	United Arab Emirates_Vegetable oils and fats	1
894	United Arab Emirates_Dairy products	1
895	United Arab Emirates_Alcoholic and other beverages	1
896	United Arab Emirates_Tobacco products	1
897	United Arab Emirates_Textiles and clothing	1
898	United Arab Emirates_Leather and footwear	1
899	United Arab Emirates_Sawmill products	1
900	United Arab Emirates_Pulp and paper	1
901	United Arab Emirates_Printing	1
902	United Arab Emirates_Coke oven products	1
903	United Arab Emirates_Refined petroleum products	1
904	United Arab Emirates_Nitrogenous fertilizers	1
905	United Arab Emirates_Non-nitrogenous and mixed fertilizers	1
906	United Arab Emirates_Basic petrochemical products	1
907	United Arab Emirates_Basic inorganic chemicals	1
908	United Arab Emirates_Basic organic chemicals	1
909	United Arab Emirates_Pharmaceuticals and medicinal products	1
910	United Arab Emirates_Dyes, paints, glues, detergents and other chemical products	1
911	United Arab Emirates_Rubber products	1
912	United Arab Emirates_Plastic products	1
913	United Arab Emirates_Clay building materials	1
914	United Arab Emirates_Glass and other ceramics n.e.c.	1
915	United Arab Emirates_Cement, lime and plaster products	1
916	United Arab Emirates_Other non-metallic mineral products n.e.c.	1
917	United Arab Emirates_Basic iron and steel	1
918	United Arab Emirates_Basic aluminium	1
919	United Arab Emirates_Basic Copper	1
920	United Arab Emirates_Basic Gold	1
921	United Arab Emirates_Basic lead/zinc/silver	1
922	United Arab Emirates_Basic nickel	1
923	United Arab Emirates_Basic tin	1
924	United Arab Emirates_Basic non-ferrous metals n.e.c.	1
925	United Arab Emirates_Fabricated metal products	1
926	United Arab Emirates_Machinery and equipment	1
927	United Arab Emirates_Motor vehicles, trailers and semi-trailers	1
928	United Arab Emirates_Other transport equipment	1
929	United Arab Emirates_Repair and installation of machinery and equipment (service)	1
930	United Arab Emirates_Computers; electronic products; optical and precision instruments	1
931	United Arab Emirates_Electrical equipment	1
932	United Arab Emirates_Furniture and other manufacturing n.e.c	1
933	United Arab Emirates_Electric power generation, transmission and distribution	1
934	United Arab Emirates_Distribution of gaseous fuels through mains	1
935	United Arab Emirates_Water collection, treatment and supply; sewerage	1
936	United Arab Emirates_Waste collection, treatment, and disposal	1
937	United Arab Emirates_Materials recovery	1
938	United Arab Emirates_Building construction	1
939	United Arab Emirates_Civil engineering construction	1
940	United Arab Emirates_Wholesale and retail trade; repair of motor vehicles and motorcycles	1
941	United Arab Emirates_Road transport	1
942	United Arab Emirates_Rail transport	1
943	United Arab Emirates_Transport via pipeline	1
944	United Arab Emirates_Water transport	1
945	United Arab Emirates_Air transport	1
946	United Arab Emirates_Services to transport	1
947	United Arab Emirates_Postal and courier services	1
948	United Arab Emirates_Hospitality	1
949	United Arab Emirates_Publishing	1
950	United Arab Emirates_Telecommunications	1
951	United Arab Emirates_Information services	1
952	United Arab Emirates_Finance and insurance	1
953	United Arab Emirates_Property and real estate	1
954	United Arab Emirates_Professional, scientific and technical services	1
955	United Arab Emirates_Administrative services	1
956	United Arab Emirates_Government; social security; defence; public order	1
957	United Arab Emirates_Education	1
958	United Arab Emirates_Human health and social work activities	1
959	United Arab Emirates_Arts, entertainment and recreation	1
960	United Arab Emirates_Other services	1
961	Argentina_Growing wheat	1
962	Argentina_Growing maize	1
963	Argentina_Growing cereals n.e.c	1
964	Argentina_Growing leguminous crops and oil seeds	1
965	Argentina_Growing rice	1
966	Argentina_Growing vegetables, roots, tubers	1
967	Argentina_Growing sugar beet and cane	1
968	Argentina_Growing tobacco	1
969	Argentina_Growing fibre crops	1
970	Argentina_Growing crops n.e.c.	1
971	Argentina_Growing grapes	1
972	Argentina_Growing fruits and nuts	1
973	Argentina_Growing beverage crops (coffee, tea etc)	1
974	Argentina_Growing spices, aromatic, drug and pharmaceutical crops	1
975	Argentina_Seeds and plant propagation	1
976	Argentina_Raising of cattle	1
977	Argentina_Raising of sheep and goats	1
978	Argentina_Raising of swine/pigs	1
979	Argentina_Raising of poultry	1
980	Argentina_Raising of animals n.e.c.; services to agriculture	1
981	Argentina_Forestry and logging	1
982	Argentina_Fishing	1
983	Argentina_Crustaceans and molluscs	1
984	Argentina_Hard coal	1
985	Argentina_Lignite and peat	1
986	Argentina_Petroleum extraction	1
987	Argentina_Gas extraction	1
988	Argentina_Iron ores	1
989	Argentina_Uranium ores	1
990	Argentina_Aluminium ore	1
991	Argentina_Copper ores	1
992	Argentina_Gold ores	1
993	Argentina_Lead/zinc/silver ores	1
994	Argentina_Nickel ores	1
995	Argentina_Tin ores	1
996	Argentina_Other non-ferrous ores	1
997	Argentina_Quarrying of stone, sand and clay	1
998	Argentina_Chemical and fertilizer minerals	1
999	Argentina_Extraction of salt	1
1000	Argentina_Mining and quarrying n.e.c.; services to mining	1
1001	Argentina_Beef meat	1
1002	Argentina_Sheep meat	1
1003	Argentina_Pork	1
1004	Argentina_Poultry meat	1
1005	Argentina_Other meat products	1
1006	Argentina_Fish products	1
1007	Argentina_Cereal products	1
1008	Argentina_Vegetable products	1
1009	Argentina_Fruit products	1
1010	Argentina_Food products and feeds n.e.c.	1
1011	Argentina_Sugar refining; cocoa, chocolate and confectionery	1
1012	Argentina_Animal oils and fats	1
1013	Argentina_Vegetable oils and fats	1
1014	Argentina_Dairy products	1
1015	Argentina_Alcoholic and other beverages	1
1016	Argentina_Tobacco products	1
1017	Argentina_Textiles and clothing	5
1018	Argentina_Leather and footwear	1
1019	Argentina_Sawmill products	1
1020	Argentina_Pulp and paper	1
1021	Argentina_Printing	1
1022	Argentina_Coke oven products	1
1023	Argentina_Refined petroleum products	1
1024	Argentina_Nitrogenous fertilizers	1
1025	Argentina_Non-nitrogenous and mixed fertilizers	1
1026	Argentina_Basic petrochemical products	1
1027	Argentina_Basic inorganic chemicals	1
1028	Argentina_Basic organic chemicals	1
1029	Argentina_Pharmaceuticals and medicinal products	1
1030	Argentina_Dyes, paints, glues, detergents and other chemical products	1
1031	Argentina_Rubber products	1
1032	Argentina_Plastic products	1
1033	Argentina_Clay building materials	1
1034	Argentina_Glass and other ceramics n.e.c.	1
1035	Argentina_Cement, lime and plaster products	1
1036	Argentina_Other non-metallic mineral products n.e.c.	1
1037	Argentina_Basic iron and steel	1
1038	Argentina_Basic aluminium	1
1039	Argentina_Basic Copper	1
1040	Argentina_Basic Gold	1
1041	Argentina_Basic lead/zinc/silver	1
1042	Argentina_Basic nickel	1
1043	Argentina_Basic tin	1
1044	Argentina_Basic non-ferrous metals n.e.c.	1
1045	Argentina_Fabricated metal products	1
1046	Argentina_Machinery and equipment	1
1047	Argentina_Motor vehicles, trailers and semi-trailers	1
1048	Argentina_Other transport equipment	1
1049	Argentina_Repair and installation of machinery and equipment (service)	1
1050	Argentina_Computers; electronic products; optical and precision instruments	1
1051	Argentina_Electrical equipment	1
1052	Argentina_Furniture and other manufacturing n.e.c	1
1053	Argentina_Electric power generation, transmission and distribution	1
1054	Argentina_Distribution of gaseous fuels through mains	1
1055	Argentina_Water collection, treatment and supply; sewerage	1
1056	Argentina_Waste collection, treatment, and disposal	1
1057	Argentina_Materials recovery	1
1058	Argentina_Building construction	1
1059	Argentina_Civil engineering construction	1
1060	Argentina_Wholesale and retail trade; repair of motor vehicles and motorcycles	1
1061	Argentina_Road transport	1
1062	Argentina_Rail transport	1
1063	Argentina_Transport via pipeline	1
1064	Argentina_Water transport	1
1065	Argentina_Air transport	1
1066	Argentina_Services to transport	1
1067	Argentina_Postal and courier services	1
1068	Argentina_Hospitality	1
1069	Argentina_Publishing	1
1070	Argentina_Telecommunications	1
1071	Argentina_Information services	1
1072	Argentina_Finance and insurance	1
1073	Argentina_Property and real estate	1
1074	Argentina_Professional, scientific and technical services	1
1075	Argentina_Administrative services	1
1076	Argentina_Government; social security; defence; public order	1
1077	Argentina_Education	1
1078	Argentina_Human health and social work activities	1
1079	Argentina_Arts, entertainment and recreation	1
1080	Argentina_Other services	1
1081	Armenia_Growing wheat	1
1082	Armenia_Growing maize	1
1083	Armenia_Growing cereals n.e.c	1
1084	Armenia_Growing leguminous crops and oil seeds	1
1085	Armenia_Growing rice	1
1086	Armenia_Growing vegetables, roots, tubers	1
1087	Armenia_Growing sugar beet and cane	1
1088	Armenia_Growing tobacco	1
1089	Armenia_Growing fibre crops	1
1090	Armenia_Growing crops n.e.c.	1
1091	Armenia_Growing grapes	1
1092	Armenia_Growing fruits and nuts	1
1093	Armenia_Growing beverage crops (coffee, tea etc)	1
1094	Armenia_Growing spices, aromatic, drug and pharmaceutical crops	1
1095	Armenia_Seeds and plant propagation	1
1096	Armenia_Raising of cattle	1
1097	Armenia_Raising of sheep and goats	1
1098	Armenia_Raising of swine/pigs	1
1099	Armenia_Raising of poultry	1
1100	Armenia_Raising of animals n.e.c.; services to agriculture	1
1101	Armenia_Forestry and logging	1
1102	Armenia_Fishing	1
1103	Armenia_Crustaceans and molluscs	1
1104	Armenia_Hard coal	1
1105	Armenia_Lignite and peat	1
1106	Armenia_Petroleum extraction	1
1107	Armenia_Gas extraction	1
1108	Armenia_Iron ores	1
1109	Armenia_Uranium ores	1
1110	Armenia_Aluminium ore	1
1111	Armenia_Copper ores	1
1112	Armenia_Gold ores	1
1113	Armenia_Lead/zinc/silver ores	1
1114	Armenia_Nickel ores	1
1115	Armenia_Tin ores	1
1116	Armenia_Other non-ferrous ores	1
1117	Armenia_Quarrying of stone, sand and clay	1
1118	Armenia_Chemical and fertilizer minerals	1
1119	Armenia_Extraction of salt	1
1120	Armenia_Mining and quarrying n.e.c.; services to mining	1
1121	Armenia_Beef meat	1
1122	Armenia_Sheep meat	1
1123	Armenia_Pork	1
1124	Armenia_Poultry meat	1
1125	Armenia_Other meat products	1
1126	Armenia_Fish products	1
1127	Armenia_Cereal products	1
1128	Armenia_Vegetable products	1
1129	Armenia_Fruit products	1
1130	Armenia_Food products and feeds n.e.c.	1
1131	Armenia_Sugar refining; cocoa, chocolate and confectionery	1
1132	Armenia_Animal oils and fats	1
1133	Armenia_Vegetable oils and fats	1
1134	Armenia_Dairy products	1
1135	Armenia_Alcoholic and other beverages	1
1136	Armenia_Tobacco products	1
1137	Armenia_Textiles and clothing	1
1138	Armenia_Leather and footwear	1
1139	Armenia_Sawmill products	1
1140	Armenia_Pulp and paper	1
1141	Armenia_Printing	1
1142	Armenia_Coke oven products	1
1143	Armenia_Refined petroleum products	1
1144	Armenia_Nitrogenous fertilizers	1
1145	Armenia_Non-nitrogenous and mixed fertilizers	1
1146	Armenia_Basic petrochemical products	1
1147	Armenia_Basic inorganic chemicals	1
1148	Armenia_Basic organic chemicals	1
1149	Armenia_Pharmaceuticals and medicinal products	1
1150	Armenia_Dyes, paints, glues, detergents and other chemical products	1
1151	Armenia_Rubber products	1
1152	Armenia_Plastic products	1
1153	Armenia_Clay building materials	1
1154	Armenia_Glass and other ceramics n.e.c.	1
1155	Armenia_Cement, lime and plaster products	1
1156	Armenia_Other non-metallic mineral products n.e.c.	1
1157	Armenia_Basic iron and steel	1
1158	Armenia_Basic aluminium	1
1159	Armenia_Basic Copper	1
1160	Armenia_Basic Gold	1
1161	Armenia_Basic lead/zinc/silver	1
1162	Armenia_Basic nickel	1
1163	Armenia_Basic tin	1
1164	Armenia_Basic non-ferrous metals n.e.c.	1
1165	Armenia_Fabricated metal products	1
1166	Armenia_Machinery and equipment	1
1167	Armenia_Motor vehicles, trailers and semi-trailers	1
1168	Armenia_Other transport equipment	1
1169	Armenia_Repair and installation of machinery and equipment (service)	1
1170	Armenia_Computers; electronic products; optical and precision instruments	1
1171	Armenia_Electrical equipment	1
1172	Armenia_Furniture and other manufacturing n.e.c	1
1173	Armenia_Electric power generation, transmission and distribution	1
1174	Armenia_Distribution of gaseous fuels through mains	1
1175	Armenia_Water collection, treatment and supply; sewerage	1
1176	Armenia_Waste collection, treatment, and disposal	1
1177	Armenia_Materials recovery	1
1178	Armenia_Building construction	1
1179	Armenia_Civil engineering construction	1
1180	Armenia_Wholesale and retail trade; repair of motor vehicles and motorcycles	1
1181	Armenia_Road transport	1
1182	Armenia_Rail transport	1
1183	Armenia_Transport via pipeline	1
1184	Armenia_Water transport	1
1185	Armenia_Air transport	1
1186	Armenia_Services to transport	1
1187	Armenia_Postal and courier services	1
1188	Armenia_Hospitality	1
1189	Armenia_Publishing	1
1190	Armenia_Telecommunications	1
1191	Armenia_Information services	1
1192	Armenia_Finance and insurance	1
1193	Armenia_Property and real estate	1
1194	Armenia_Professional, scientific and technical services	1
1195	Armenia_Administrative services	1
1196	Armenia_Government; social security; defence; public order	1
1197	Armenia_Education	1
1198	Armenia_Human health and social work activities	1
1199	Armenia_Arts, entertainment and recreation	1
1200	Armenia_Other services	1
1201	Australia_Growing wheat	1
1202	Australia_Growing maize	1
1203	Australia_Growing cereals n.e.c	1
1204	Australia_Growing leguminous crops and oil seeds	1
1205	Australia_Growing rice	1
1206	Australia_Growing vegetables, roots, tubers	1
1207	Australia_Growing sugar beet and cane	1
1208	Australia_Growing tobacco	1
1209	Australia_Growing fibre crops	1
1210	Australia_Growing crops n.e.c.	1
1211	Australia_Growing grapes	1
1212	Australia_Growing fruits and nuts	1
1213	Australia_Growing beverage crops (coffee, tea etc)	1
1214	Australia_Growing spices, aromatic, drug and pharmaceutical crops	1
1215	Australia_Seeds and plant propagation	1
1216	Australia_Raising of cattle	1
1217	Australia_Raising of sheep and goats	1
1218	Australia_Raising of swine/pigs	1
1219	Australia_Raising of poultry	1
1220	Australia_Raising of animals n.e.c.; services to agriculture	1
1221	Australia_Forestry and logging	1
1222	Australia_Fishing	1
1223	Australia_Crustaceans and molluscs	1
1224	Australia_Hard coal	1
1225	Australia_Lignite and peat	1
1226	Australia_Petroleum extraction	1
1227	Australia_Gas extraction	1
1228	Australia_Iron ores	1
1229	Australia_Uranium ores	1
1230	Australia_Aluminium ore	1
1231	Australia_Copper ores	1
1232	Australia_Gold ores	1
1233	Australia_Lead/zinc/silver ores	1
1234	Australia_Nickel ores	1
1235	Australia_Tin ores	1
1236	Australia_Other non-ferrous ores	1
1237	Australia_Quarrying of stone, sand and clay	1
1238	Australia_Chemical and fertilizer minerals	1
1239	Australia_Extraction of salt	1
1240	Australia_Mining and quarrying n.e.c.; services to mining	1
1241	Australia_Beef meat	1
1242	Australia_Sheep meat	1
1243	Australia_Pork	1
1244	Australia_Poultry meat	1
1245	Australia_Other meat products	1
1246	Australia_Fish products	1
1247	Australia_Cereal products	1
1248	Australia_Vegetable products	1
1249	Australia_Fruit products	1
1250	Australia_Food products and feeds n.e.c.	1
1251	Australia_Sugar refining; cocoa, chocolate and confectionery	1
1252	Australia_Animal oils and fats	1
1253	Australia_Vegetable oils and fats	1
1254	Australia_Dairy products	1
1255	Australia_Alcoholic and other beverages	1
1256	Australia_Tobacco products	1
1257	Australia_Textiles and clothing	1
1258	Australia_Leather and footwear	1
1259	Australia_Sawmill products	1
1260	Australia_Pulp and paper	1
1261	Australia_Printing	1
1262	Australia_Coke oven products	1
1263	Australia_Refined petroleum products	1
1264	Australia_Nitrogenous fertilizers	1
1265	Australia_Non-nitrogenous and mixed fertilizers	1
1266	Australia_Basic petrochemical products	1
1267	Australia_Basic inorganic chemicals	1
1268	Australia_Basic organic chemicals	1
1269	Australia_Pharmaceuticals and medicinal products	1
1270	Australia_Dyes, paints, glues, detergents and other chemical products	1
1271	Australia_Rubber products	1
1272	Australia_Plastic products	1
1273	Australia_Clay building materials	1
1274	Australia_Glass and other ceramics n.e.c.	1
1275	Australia_Cement, lime and plaster products	1
1276	Australia_Other non-metallic mineral products n.e.c.	1
1277	Australia_Basic iron and steel	1
1278	Australia_Basic aluminium	1
1279	Australia_Basic Copper	1
1280	Australia_Basic Gold	1
1281	Australia_Basic lead/zinc/silver	1
1282	Australia_Basic nickel	1
1283	Australia_Basic tin	1
1284	Australia_Basic non-ferrous metals n.e.c.	1
1285	Australia_Fabricated metal products	1
1286	Australia_Machinery and equipment	1
1287	Australia_Motor vehicles, trailers and semi-trailers	1
1288	Australia_Other transport equipment	1
1289	Australia_Repair and installation of machinery and equipment (service)	1
1290	Australia_Computers; electronic products; optical and precision instruments	1
1291	Australia_Electrical equipment	1
1292	Australia_Furniture and other manufacturing n.e.c	1
1293	Australia_Electric power generation, transmission and distribution	1
1294	Australia_Distribution of gaseous fuels through mains	1
1295	Australia_Water collection, treatment and supply; sewerage	1
1296	Australia_Waste collection, treatment, and disposal	1
1297	Australia_Materials recovery	1
1298	Australia_Building construction	1
1299	Australia_Civil engineering construction	1
1300	Australia_Wholesale and retail trade; repair of motor vehicles and motorcycles	1
1301	Australia_Road transport	1
1302	Australia_Rail transport	1
1303	Australia_Transport via pipeline	1
1304	Australia_Water transport	1
1305	Australia_Air transport	1
1306	Australia_Services to transport	1
1307	Australia_Postal and courier services	1
1308	Australia_Hospitality	1
1309	Australia_Publishing	1
1310	Australia_Telecommunications	1
1311	Australia_Information services	1
1312	Australia_Finance and insurance	1
1313	Australia_Property and real estate	1
1314	Australia_Professional, scientific and technical services	1
1315	Australia_Administrative services	1
1316	Australia_Government; social security; defence; public order	1
1317	Australia_Education	1
1318	Australia_Human health and social work activities	1
1319	Australia_Arts, entertainment and recreation	1
1320	Australia_Other services	1
1321	Austria_Growing wheat	1
1322	Austria_Growing maize	1
1323	Austria_Growing cereals n.e.c	1
1324	Austria_Growing leguminous crops and oil seeds	1
1325	Austria_Growing rice	1
1326	Austria_Growing vegetables, roots, tubers	1
1327	Austria_Growing sugar beet and cane	1
1328	Austria_Growing tobacco	1
1329	Austria_Growing fibre crops	1
1330	Austria_Growing crops n.e.c.	1
1331	Austria_Growing grapes	1
1332	Austria_Growing fruits and nuts	1
1333	Austria_Growing beverage crops (coffee, tea etc)	1
1334	Austria_Growing spices, aromatic, drug and pharmaceutical crops	1
1335	Austria_Seeds and plant propagation	1
1336	Austria_Raising of cattle	1
1337	Austria_Raising of sheep and goats	1
1338	Austria_Raising of swine/pigs	1
1339	Austria_Raising of poultry	1
1340	Austria_Raising of animals n.e.c.; services to agriculture	1
1341	Austria_Forestry and logging	1
1342	Austria_Fishing	1
1343	Austria_Crustaceans and molluscs	1
1344	Austria_Hard coal	1
1345	Austria_Lignite and peat	1
1346	Austria_Petroleum extraction	1
1347	Austria_Gas extraction	1
1348	Austria_Iron ores	1
1349	Austria_Uranium ores	1
1350	Austria_Aluminium ore	1
1351	Austria_Copper ores	1
1352	Austria_Gold ores	1
1353	Austria_Lead/zinc/silver ores	1
1354	Austria_Nickel ores	1
1355	Austria_Tin ores	1
1356	Austria_Other non-ferrous ores	1
1357	Austria_Quarrying of stone, sand and clay	1
1358	Austria_Chemical and fertilizer minerals	1
1359	Austria_Extraction of salt	1
1360	Austria_Mining and quarrying n.e.c.; services to mining	1
1361	Austria_Beef meat	1
1362	Austria_Sheep meat	1
1363	Austria_Pork	1
1364	Austria_Poultry meat	1
1365	Austria_Other meat products	1
1366	Austria_Fish products	1
1367	Austria_Cereal products	1
1368	Austria_Vegetable products	1
1369	Austria_Fruit products	1
1370	Austria_Food products and feeds n.e.c.	1
1371	Austria_Sugar refining; cocoa, chocolate and confectionery	1
1372	Austria_Animal oils and fats	1
1373	Austria_Vegetable oils and fats	1
1374	Austria_Dairy products	1
1375	Austria_Alcoholic and other beverages	1
1376	Austria_Tobacco products	1
1377	Austria_Textiles and clothing	1
1378	Austria_Leather and footwear	1
1379	Austria_Sawmill products	1
1380	Austria_Pulp and paper	1
1381	Austria_Printing	1
1382	Austria_Coke oven products	1
1383	Austria_Refined petroleum products	1
1384	Austria_Nitrogenous fertilizers	1
1385	Austria_Non-nitrogenous and mixed fertilizers	1
1386	Austria_Basic petrochemical products	1
1387	Austria_Basic inorganic chemicals	1
1388	Austria_Basic organic chemicals	1
1389	Austria_Pharmaceuticals and medicinal products	1
1390	Austria_Dyes, paints, glues, detergents and other chemical products	1
1391	Austria_Rubber products	1
1392	Austria_Plastic products	1
1393	Austria_Clay building materials	1
1394	Austria_Glass and other ceramics n.e.c.	1
1395	Austria_Cement, lime and plaster products	1
1396	Austria_Other non-metallic mineral products n.e.c.	1
1397	Austria_Basic iron and steel	1
1398	Austria_Basic aluminium	1
1399	Austria_Basic Copper	1
1400	Austria_Basic Gold	1
1401	Austria_Basic lead/zinc/silver	1
1402	Austria_Basic nickel	1
1403	Austria_Basic tin	1
1404	Austria_Basic non-ferrous metals n.e.c.	1
1405	Austria_Fabricated metal products	1
1406	Austria_Machinery and equipment	1
1407	Austria_Motor vehicles, trailers and semi-trailers	1
1408	Austria_Other transport equipment	1
1409	Austria_Repair and installation of machinery and equipment (service)	1
1410	Austria_Computers; electronic products; optical and precision instruments	1
1411	Austria_Electrical equipment	1
1412	Austria_Furniture and other manufacturing n.e.c	1
1413	Austria_Electric power generation, transmission and distribution	1
1414	Austria_Distribution of gaseous fuels through mains	1
1415	Austria_Water collection, treatment and supply; sewerage	1
1416	Austria_Waste collection, treatment, and disposal	1
1417	Austria_Materials recovery	1
1418	Austria_Building construction	1
1419	Austria_Civil engineering construction	1
1420	Austria_Wholesale and retail trade; repair of motor vehicles and motorcycles	1
1421	Austria_Road transport	1
1422	Austria_Rail transport	1
1423	Austria_Transport via pipeline	1
1424	Austria_Water transport	1
1425	Austria_Air transport	1
1426	Austria_Services to transport	1
1427	Austria_Postal and courier services	1
1428	Austria_Hospitality	1
1429	Austria_Publishing	1
1430	Austria_Telecommunications	1
1431	Austria_Information services	1
1432	Austria_Finance and insurance	1
1433	Austria_Property and real estate	1
1434	Austria_Professional, scientific and technical services	1
1435	Austria_Administrative services	1
1436	Austria_Government; social security; defence; public order	1
1437	Austria_Education	1
1438	Austria_Human health and social work activities	1
1439	Austria_Arts, entertainment and recreation	1
1440	Austria_Other services	1
1441	Azerbaijan_Growing wheat	1
1442	Azerbaijan_Growing maize	1
1443	Azerbaijan_Growing cereals n.e.c	1
1444	Azerbaijan_Growing leguminous crops and oil seeds	1
1445	Azerbaijan_Growing rice	1
1446	Azerbaijan_Growing vegetables, roots, tubers	1
1447	Azerbaijan_Growing sugar beet and cane	1
1448	Azerbaijan_Growing tobacco	1
1449	Azerbaijan_Growing fibre crops	1
1450	Azerbaijan_Growing crops n.e.c.	1
1451	Azerbaijan_Growing grapes	1
1452	Azerbaijan_Growing fruits and nuts	1
1453	Azerbaijan_Growing beverage crops (coffee, tea etc)	1
1454	Azerbaijan_Growing spices, aromatic, drug and pharmaceutical crops	1
1455	Azerbaijan_Seeds and plant propagation	1
1456	Azerbaijan_Raising of cattle	1
1457	Azerbaijan_Raising of sheep and goats	1
1458	Azerbaijan_Raising of swine/pigs	1
1459	Azerbaijan_Raising of poultry	1
1460	Azerbaijan_Raising of animals n.e.c.; services to agriculture	1
1461	Azerbaijan_Forestry and logging	1
1462	Azerbaijan_Fishing	1
1463	Azerbaijan_Crustaceans and molluscs	1
1464	Azerbaijan_Hard coal	1
1465	Azerbaijan_Lignite and peat	1
1466	Azerbaijan_Petroleum extraction	1
1467	Azerbaijan_Gas extraction	1
1468	Azerbaijan_Iron ores	1
1469	Azerbaijan_Uranium ores	1
1470	Azerbaijan_Aluminium ore	1
1471	Azerbaijan_Copper ores	1
1472	Azerbaijan_Gold ores	1
1473	Azerbaijan_Lead/zinc/silver ores	1
1474	Azerbaijan_Nickel ores	1
1475	Azerbaijan_Tin ores	1
1476	Azerbaijan_Other non-ferrous ores	1
1477	Azerbaijan_Quarrying of stone, sand and clay	1
1478	Azerbaijan_Chemical and fertilizer minerals	1
1479	Azerbaijan_Extraction of salt	1
1480	Azerbaijan_Mining and quarrying n.e.c.; services to mining	1
1481	Azerbaijan_Beef meat	1
1482	Azerbaijan_Sheep meat	1
1483	Azerbaijan_Pork	1
1484	Azerbaijan_Poultry meat	1
1485	Azerbaijan_Other meat products	1
1486	Azerbaijan_Fish products	1
1487	Azerbaijan_Cereal products	1
1488	Azerbaijan_Vegetable products	1
1489	Azerbaijan_Fruit products	1
1490	Azerbaijan_Food products and feeds n.e.c.	1
1491	Azerbaijan_Sugar refining; cocoa, chocolate and confectionery	1
1492	Azerbaijan_Animal oils and fats	1
1493	Azerbaijan_Vegetable oils and fats	1
1494	Azerbaijan_Dairy products	1
1495	Azerbaijan_Alcoholic and other beverages	1
1496	Azerbaijan_Tobacco products	1
1497	Azerbaijan_Textiles and clothing	1
1498	Azerbaijan_Leather and footwear	1
1499	Azerbaijan_Sawmill products	1
1500	Azerbaijan_Pulp and paper	1
1501	Azerbaijan_Printing	1
1502	Azerbaijan_Coke oven products	1
1503	Azerbaijan_Refined petroleum products	1
1504	Azerbaijan_Nitrogenous fertilizers	1
1505	Azerbaijan_Non-nitrogenous and mixed fertilizers	1
1506	Azerbaijan_Basic petrochemical products	1
1507	Azerbaijan_Basic inorganic chemicals	1
1508	Azerbaijan_Basic organic chemicals	1
1509	Azerbaijan_Pharmaceuticals and medicinal products	1
1510	Azerbaijan_Dyes, paints, glues, detergents and other chemical products	1
1511	Azerbaijan_Rubber products	1
1512	Azerbaijan_Plastic products	1
1513	Azerbaijan_Clay building materials	1
1514	Azerbaijan_Glass and other ceramics n.e.c.	1
1515	Azerbaijan_Cement, lime and plaster products	1
1516	Azerbaijan_Other non-metallic mineral products n.e.c.	1
1517	Azerbaijan_Basic iron and steel	1
1518	Azerbaijan_Basic aluminium	1
1519	Azerbaijan_Basic Copper	1
1520	Azerbaijan_Basic Gold	1
1521	Azerbaijan_Basic lead/zinc/silver	1
1522	Azerbaijan_Basic nickel	1
1523	Azerbaijan_Basic tin	1
1524	Azerbaijan_Basic non-ferrous metals n.e.c.	1
1525	Azerbaijan_Fabricated metal products	1
1526	Azerbaijan_Machinery and equipment	1
1527	Azerbaijan_Motor vehicles, trailers and semi-trailers	1
1528	Azerbaijan_Other transport equipment	1
1529	Azerbaijan_Repair and installation of machinery and equipment (service)	1
1530	Azerbaijan_Computers; electronic products; optical and precision instruments	1
1531	Azerbaijan_Electrical equipment	1
1532	Azerbaijan_Furniture and other manufacturing n.e.c	1
1533	Azerbaijan_Electric power generation, transmission and distribution	1
1534	Azerbaijan_Distribution of gaseous fuels through mains	1
1535	Azerbaijan_Water collection, treatment and supply; sewerage	1
1536	Azerbaijan_Waste collection, treatment, and disposal	1
1537	Azerbaijan_Materials recovery	1
1538	Azerbaijan_Building construction	1
1539	Azerbaijan_Civil engineering construction	1
1540	Azerbaijan_Wholesale and retail trade; repair of motor vehicles and motorcycles	1
1541	Azerbaijan_Road transport	1
1542	Azerbaijan_Rail transport	1
1543	Azerbaijan_Transport via pipeline	1
1544	Azerbaijan_Water transport	1
1545	Azerbaijan_Air transport	1
1546	Azerbaijan_Services to transport	1
1547	Azerbaijan_Postal and courier services	1
1548	Azerbaijan_Hospitality	1
1549	Azerbaijan_Publishing	1
1550	Azerbaijan_Telecommunications	1
1551	Azerbaijan_Information services	1
1552	Azerbaijan_Finance and insurance	1
1553	Azerbaijan_Property and real estate	1
1554	Azerbaijan_Professional, scientific and technical services	1
1555	Azerbaijan_Administrative services	1
1556	Azerbaijan_Government; social security; defence; public order	1
1557	Azerbaijan_Education	1
1558	Azerbaijan_Human health and social work activities	1
1559	Azerbaijan_Arts, entertainment and recreation	1
1560	Azerbaijan_Other services	1
1561	Burundi_Growing wheat	1
1562	Burundi_Growing maize	1
1563	Burundi_Growing cereals n.e.c	1
1564	Burundi_Growing leguminous crops and oil seeds	1
1565	Burundi_Growing rice	1
1566	Burundi_Growing vegetables, roots, tubers	1
1567	Burundi_Growing sugar beet and cane	1
1568	Burundi_Growing tobacco	1
1569	Burundi_Growing fibre crops	1
1570	Burundi_Growing crops n.e.c.	1
1571	Burundi_Growing grapes	1
1572	Burundi_Growing fruits and nuts	1
1573	Burundi_Growing beverage crops (coffee, tea etc)	1
1574	Burundi_Growing spices, aromatic, drug and pharmaceutical crops	1
1575	Burundi_Seeds and plant propagation	1
1576	Burundi_Raising of cattle	1
1577	Burundi_Raising of sheep and goats	1
1578	Burundi_Raising of swine/pigs	1
1579	Burundi_Raising of poultry	1
1580	Burundi_Raising of animals n.e.c.; services to agriculture	1
1581	Burundi_Forestry and logging	1
1582	Burundi_Fishing	1
1583	Burundi_Crustaceans and molluscs	1
1584	Burundi_Hard coal	1
1585	Burundi_Lignite and peat	1
1586	Burundi_Petroleum extraction	1
1587	Burundi_Gas extraction	1
1588	Burundi_Iron ores	1
1589	Burundi_Uranium ores	1
1590	Burundi_Aluminium ore	1
1591	Burundi_Copper ores	1
1592	Burundi_Gold ores	1
1593	Burundi_Lead/zinc/silver ores	1
1594	Burundi_Nickel ores	1
1595	Burundi_Tin ores	1
1596	Burundi_Other non-ferrous ores	1
1597	Burundi_Quarrying of stone, sand and clay	1
1598	Burundi_Chemical and fertilizer minerals	1
1599	Burundi_Extraction of salt	1
1600	Burundi_Mining and quarrying n.e.c.; services to mining	1
1601	Burundi_Beef meat	1
1602	Burundi_Sheep meat	1
1603	Burundi_Pork	1
1604	Burundi_Poultry meat	1
1605	Burundi_Other meat products	1
1606	Burundi_Fish products	1
1607	Burundi_Cereal products	1
1608	Burundi_Vegetable products	1
1609	Burundi_Fruit products	1
1610	Burundi_Food products and feeds n.e.c.	1
1611	Burundi_Sugar refining; cocoa, chocolate and confectionery	1
1612	Burundi_Animal oils and fats	1
1613	Burundi_Vegetable oils and fats	1
1614	Burundi_Dairy products	1
1615	Burundi_Alcoholic and other beverages	1
1616	Burundi_Tobacco products	1
1617	Burundi_Textiles and clothing	1
1618	Burundi_Leather and footwear	1
1619	Burundi_Sawmill products	1
1620	Burundi_Pulp and paper	1
1621	Burundi_Printing	1
1622	Burundi_Coke oven products	1
1623	Burundi_Refined petroleum products	1
1624	Burundi_Nitrogenous fertilizers	1
1625	Burundi_Non-nitrogenous and mixed fertilizers	1
1626	Burundi_Basic petrochemical products	1
1627	Burundi_Basic inorganic chemicals	1
1628	Burundi_Basic organic chemicals	1
1629	Burundi_Pharmaceuticals and medicinal products	1
1630	Burundi_Dyes, paints, glues, detergents and other chemical products	1
1631	Burundi_Rubber products	1
1632	Burundi_Plastic products	1
1633	Burundi_Clay building materials	1
1634	Burundi_Glass and other ceramics n.e.c.	1
1635	Burundi_Cement, lime and plaster products	1
1636	Burundi_Other non-metallic mineral products n.e.c.	1
1637	Burundi_Basic iron and steel	1
1638	Burundi_Basic aluminium	1
1639	Burundi_Basic Copper	1
1640	Burundi_Basic Gold	1
1641	Burundi_Basic lead/zinc/silver	1
1642	Burundi_Basic nickel	1
1643	Burundi_Basic tin	1
1644	Burundi_Basic non-ferrous metals n.e.c.	1
1645	Burundi_Fabricated metal products	1
1646	Burundi_Machinery and equipment	1
1647	Burundi_Motor vehicles, trailers and semi-trailers	1
1648	Burundi_Other transport equipment	1
1649	Burundi_Repair and installation of machinery and equipment (service)	1
1650	Burundi_Computers; electronic products; optical and precision instruments	1
1651	Burundi_Electrical equipment	1
1652	Burundi_Furniture and other manufacturing n.e.c	1
1653	Burundi_Electric power generation, transmission and distribution	1
1654	Burundi_Distribution of gaseous fuels through mains	1
1655	Burundi_Water collection, treatment and supply; sewerage	1
1656	Burundi_Waste collection, treatment, and disposal	1
1657	Burundi_Materials recovery	1
1658	Burundi_Building construction	1
1659	Burundi_Civil engineering construction	1
1660	Burundi_Wholesale and retail trade; repair of motor vehicles and motorcycles	1
1661	Burundi_Road transport	1
1662	Burundi_Rail transport	1
1663	Burundi_Transport via pipeline	1
1664	Burundi_Water transport	1
1665	Burundi_Air transport	1
1666	Burundi_Services to transport	1
1667	Burundi_Postal and courier services	1
1668	Burundi_Hospitality	1
1669	Burundi_Publishing	1
1670	Burundi_Telecommunications	1
1671	Burundi_Information services	1
1672	Burundi_Finance and insurance	1
1673	Burundi_Property and real estate	1
1674	Burundi_Professional, scientific and technical services	1
1675	Burundi_Administrative services	1
1676	Burundi_Government; social security; defence; public order	1
1677	Burundi_Education	1
1678	Burundi_Human health and social work activities	1
1679	Burundi_Arts, entertainment and recreation	1
1680	Burundi_Other services	1
1681	Belgium_Growing wheat	1
1682	Belgium_Growing maize	1
1683	Belgium_Growing cereals n.e.c	1
1684	Belgium_Growing leguminous crops and oil seeds	1
1685	Belgium_Growing rice	1
1686	Belgium_Growing vegetables, roots, tubers	1
1687	Belgium_Growing sugar beet and cane	1
1688	Belgium_Growing tobacco	1
1689	Belgium_Growing fibre crops	1
1690	Belgium_Growing crops n.e.c.	1
1691	Belgium_Growing grapes	1
1692	Belgium_Growing fruits and nuts	1
1693	Belgium_Growing beverage crops (coffee, tea etc)	1
1694	Belgium_Growing spices, aromatic, drug and pharmaceutical crops	1
1695	Belgium_Seeds and plant propagation	1
1696	Belgium_Raising of cattle	1
1697	Belgium_Raising of sheep and goats	1
1698	Belgium_Raising of swine/pigs	1
1699	Belgium_Raising of poultry	1
1700	Belgium_Raising of animals n.e.c.; services to agriculture	1
1701	Belgium_Forestry and logging	1
1702	Belgium_Fishing	1
1703	Belgium_Crustaceans and molluscs	1
1704	Belgium_Hard coal	1
1705	Belgium_Lignite and peat	1
1706	Belgium_Petroleum extraction	1
1707	Belgium_Gas extraction	1
1708	Belgium_Iron ores	1
1709	Belgium_Uranium ores	1
1710	Belgium_Aluminium ore	1
1711	Belgium_Copper ores	1
1712	Belgium_Gold ores	1
1713	Belgium_Lead/zinc/silver ores	1
1714	Belgium_Nickel ores	1
1715	Belgium_Tin ores	1
1716	Belgium_Other non-ferrous ores	1
1717	Belgium_Quarrying of stone, sand and clay	1
1718	Belgium_Chemical and fertilizer minerals	1
1719	Belgium_Extraction of salt	1
1720	Belgium_Mining and quarrying n.e.c.; services to mining	1
1721	Belgium_Beef meat	1
1722	Belgium_Sheep meat	1
1723	Belgium_Pork	1
1724	Belgium_Poultry meat	1
1725	Belgium_Other meat products	1
1726	Belgium_Fish products	1
1727	Belgium_Cereal products	1
1728	Belgium_Vegetable products	1
1729	Belgium_Fruit products	1
1730	Belgium_Food products and feeds n.e.c.	1
1731	Belgium_Sugar refining; cocoa, chocolate and confectionery	1
1732	Belgium_Animal oils and fats	1
1733	Belgium_Vegetable oils and fats	1
1734	Belgium_Dairy products	1
1735	Belgium_Alcoholic and other beverages	1
1736	Belgium_Tobacco products	1
1737	Belgium_Textiles and clothing	1
1738	Belgium_Leather and footwear	1
1739	Belgium_Sawmill products	1
1740	Belgium_Pulp and paper	1
1741	Belgium_Printing	1
1742	Belgium_Coke oven products	1
1743	Belgium_Refined petroleum products	1
1744	Belgium_Nitrogenous fertilizers	1
1745	Belgium_Non-nitrogenous and mixed fertilizers	1
1746	Belgium_Basic petrochemical products	1
1747	Belgium_Basic inorganic chemicals	1
1748	Belgium_Basic organic chemicals	1
1749	Belgium_Pharmaceuticals and medicinal products	1
1750	Belgium_Dyes, paints, glues, detergents and other chemical products	1
1751	Belgium_Rubber products	1
1752	Belgium_Plastic products	1
1753	Belgium_Clay building materials	1
1754	Belgium_Glass and other ceramics n.e.c.	1
1755	Belgium_Cement, lime and plaster products	1
1756	Belgium_Other non-metallic mineral products n.e.c.	1
1757	Belgium_Basic iron and steel	1
1758	Belgium_Basic aluminium	1
1759	Belgium_Basic Copper	1
1760	Belgium_Basic Gold	1
1761	Belgium_Basic lead/zinc/silver	1
1762	Belgium_Basic nickel	1
1763	Belgium_Basic tin	1
1764	Belgium_Basic non-ferrous metals n.e.c.	1
1765	Belgium_Fabricated metal products	1
1766	Belgium_Machinery and equipment	1
1767	Belgium_Motor vehicles, trailers and semi-trailers	1
1768	Belgium_Other transport equipment	1
1769	Belgium_Repair and installation of machinery and equipment (service)	1
1770	Belgium_Computers; electronic products; optical and precision instruments	1
1771	Belgium_Electrical equipment	1
1772	Belgium_Furniture and other manufacturing n.e.c	1
1773	Belgium_Electric power generation, transmission and distribution	1
1774	Belgium_Distribution of gaseous fuels through mains	1
1775	Belgium_Water collection, treatment and supply; sewerage	1
1776	Belgium_Waste collection, treatment, and disposal	1
1777	Belgium_Materials recovery	1
1778	Belgium_Building construction	1
1779	Belgium_Civil engineering construction	1
1780	Belgium_Wholesale and retail trade; repair of motor vehicles and motorcycles	1
1781	Belgium_Road transport	1
1782	Belgium_Rail transport	1
1783	Belgium_Transport via pipeline	1
1784	Belgium_Water transport	1
1785	Belgium_Air transport	1
1786	Belgium_Services to transport	1
1787	Belgium_Postal and courier services	1
1788	Belgium_Hospitality	1
1789	Belgium_Publishing	1
1790	Belgium_Telecommunications	1
1791	Belgium_Information services	1
1792	Belgium_Finance and insurance	1
1793	Belgium_Property and real estate	1
1794	Belgium_Professional, scientific and technical services	1
1795	Belgium_Administrative services	1
1796	Belgium_Government; social security; defence; public order	1
1797	Belgium_Education	1
1798	Belgium_Human health and social work activities	1
1799	Belgium_Arts, entertainment and recreation	1
1800	Belgium_Other services	1
1801	Benin_Growing wheat	1
1802	Benin_Growing maize	1
1803	Benin_Growing cereals n.e.c	1
1804	Benin_Growing leguminous crops and oil seeds	1
1805	Benin_Growing rice	1
1806	Benin_Growing vegetables, roots, tubers	1
1807	Benin_Growing sugar beet and cane	1
1808	Benin_Growing tobacco	1
1809	Benin_Growing fibre crops	5
1810	Benin_Growing crops n.e.c.	1
1811	Benin_Growing grapes	1
1812	Benin_Growing fruits and nuts	1
1813	Benin_Growing beverage crops (coffee, tea etc)	1
1814	Benin_Growing spices, aromatic, drug and pharmaceutical crops	1
1815	Benin_Seeds and plant propagation	1
1816	Benin_Raising of cattle	1
1817	Benin_Raising of sheep and goats	1
1818	Benin_Raising of swine/pigs	1
1819	Benin_Raising of poultry	1
1820	Benin_Raising of animals n.e.c.; services to agriculture	1
1821	Benin_Forestry and logging	1
1822	Benin_Fishing	1
1823	Benin_Crustaceans and molluscs	1
1824	Benin_Hard coal	1
1825	Benin_Lignite and peat	1
1826	Benin_Petroleum extraction	1
1827	Benin_Gas extraction	1
1828	Benin_Iron ores	1
1829	Benin_Uranium ores	1
1830	Benin_Aluminium ore	1
1831	Benin_Copper ores	1
1832	Benin_Gold ores	1
1833	Benin_Lead/zinc/silver ores	1
1834	Benin_Nickel ores	1
1835	Benin_Tin ores	1
1836	Benin_Other non-ferrous ores	1
1837	Benin_Quarrying of stone, sand and clay	1
1838	Benin_Chemical and fertilizer minerals	1
1839	Benin_Extraction of salt	1
1840	Benin_Mining and quarrying n.e.c.; services to mining	1
1841	Benin_Beef meat	1
1842	Benin_Sheep meat	1
1843	Benin_Pork	1
1844	Benin_Poultry meat	1
1845	Benin_Other meat products	1
1846	Benin_Fish products	1
1847	Benin_Cereal products	1
1848	Benin_Vegetable products	1
1849	Benin_Fruit products	1
1850	Benin_Food products and feeds n.e.c.	1
1851	Benin_Sugar refining; cocoa, chocolate and confectionery	1
1852	Benin_Animal oils and fats	1
1853	Benin_Vegetable oils and fats	1
1854	Benin_Dairy products	1
1855	Benin_Alcoholic and other beverages	1
1856	Benin_Tobacco products	1
1857	Benin_Textiles and clothing	1
1858	Benin_Leather and footwear	1
1859	Benin_Sawmill products	1
1860	Benin_Pulp and paper	1
1861	Benin_Printing	1
1862	Benin_Coke oven products	1
1863	Benin_Refined petroleum products	1
1864	Benin_Nitrogenous fertilizers	1
1865	Benin_Non-nitrogenous and mixed fertilizers	1
1866	Benin_Basic petrochemical products	1
1867	Benin_Basic inorganic chemicals	1
1868	Benin_Basic organic chemicals	1
1869	Benin_Pharmaceuticals and medicinal products	1
1870	Benin_Dyes, paints, glues, detergents and other chemical products	1
1871	Benin_Rubber products	1
1872	Benin_Plastic products	1
1873	Benin_Clay building materials	1
1874	Benin_Glass and other ceramics n.e.c.	1
1875	Benin_Cement, lime and plaster products	1
1876	Benin_Other non-metallic mineral products n.e.c.	1
1877	Benin_Basic iron and steel	1
1878	Benin_Basic aluminium	1
1879	Benin_Basic Copper	1
1880	Benin_Basic Gold	1
1881	Benin_Basic lead/zinc/silver	1
1882	Benin_Basic nickel	1
1883	Benin_Basic tin	1
1884	Benin_Basic non-ferrous metals n.e.c.	1
1885	Benin_Fabricated metal products	1
1886	Benin_Machinery and equipment	1
1887	Benin_Motor vehicles, trailers and semi-trailers	1
1888	Benin_Other transport equipment	1
1889	Benin_Repair and installation of machinery and equipment (service)	1
1890	Benin_Computers; electronic products; optical and precision instruments	1
1891	Benin_Electrical equipment	1
1892	Benin_Furniture and other manufacturing n.e.c	1
1893	Benin_Electric power generation, transmission and distribution	1
1894	Benin_Distribution of gaseous fuels through mains	1
1895	Benin_Water collection, treatment and supply; sewerage	1
1896	Benin_Waste collection, treatment, and disposal	1
1897	Benin_Materials recovery	1
1898	Benin_Building construction	1
1899	Benin_Civil engineering construction	1
1900	Benin_Wholesale and retail trade; repair of motor vehicles and motorcycles	1
1901	Benin_Road transport	1
1902	Benin_Rail transport	1
1903	Benin_Transport via pipeline	1
1904	Benin_Water transport	1
1905	Benin_Air transport	1
1906	Benin_Services to transport	1
1907	Benin_Postal and courier services	1
1908	Benin_Hospitality	1
1909	Benin_Publishing	1
1910	Benin_Telecommunications	1
1911	Benin_Information services	1
1912	Benin_Finance and insurance	1
1913	Benin_Property and real estate	1
1914	Benin_Professional, scientific and technical services	1
1915	Benin_Administrative services	1
1916	Benin_Government; social security; defence; public order	1
1917	Benin_Education	1
1918	Benin_Human health and social work activities	1
1919	Benin_Arts, entertainment and recreation	1
1920	Benin_Other services	1
1921	Burkina Faso_Growing wheat	1
1922	Burkina Faso_Growing maize	1
1923	Burkina Faso_Growing cereals n.e.c	1
1924	Burkina Faso_Growing leguminous crops and oil seeds	1
1925	Burkina Faso_Growing rice	1
1926	Burkina Faso_Growing vegetables, roots, tubers	1
1927	Burkina Faso_Growing sugar beet and cane	1
1928	Burkina Faso_Growing tobacco	1
1929	Burkina Faso_Growing fibre crops	5
1930	Burkina Faso_Growing crops n.e.c.	1
1931	Burkina Faso_Growing grapes	1
1932	Burkina Faso_Growing fruits and nuts	1
1933	Burkina Faso_Growing beverage crops (coffee, tea etc)	1
1934	Burkina Faso_Growing spices, aromatic, drug and pharmaceutical crops	1
1935	Burkina Faso_Seeds and plant propagation	1
1936	Burkina Faso_Raising of cattle	1
1937	Burkina Faso_Raising of sheep and goats	1
1938	Burkina Faso_Raising of swine/pigs	1
1939	Burkina Faso_Raising of poultry	1
1940	Burkina Faso_Raising of animals n.e.c.; services to agriculture	1
1941	Burkina Faso_Forestry and logging	1
1942	Burkina Faso_Fishing	1
1943	Burkina Faso_Crustaceans and molluscs	1
1944	Burkina Faso_Hard coal	1
1945	Burkina Faso_Lignite and peat	1
1946	Burkina Faso_Petroleum extraction	1
1947	Burkina Faso_Gas extraction	1
1948	Burkina Faso_Iron ores	1
1949	Burkina Faso_Uranium ores	1
1950	Burkina Faso_Aluminium ore	1
1951	Burkina Faso_Copper ores	1
1952	Burkina Faso_Gold ores	5
1953	Burkina Faso_Lead/zinc/silver ores	1
1954	Burkina Faso_Nickel ores	1
1955	Burkina Faso_Tin ores	1
1956	Burkina Faso_Other non-ferrous ores	1
1957	Burkina Faso_Quarrying of stone, sand and clay	1
1958	Burkina Faso_Chemical and fertilizer minerals	1
1959	Burkina Faso_Extraction of salt	1
1960	Burkina Faso_Mining and quarrying n.e.c.; services to mining	1
1961	Burkina Faso_Beef meat	1
1962	Burkina Faso_Sheep meat	1
1963	Burkina Faso_Pork	1
1964	Burkina Faso_Poultry meat	1
1965	Burkina Faso_Other meat products	1
1966	Burkina Faso_Fish products	1
1967	Burkina Faso_Cereal products	1
1968	Burkina Faso_Vegetable products	1
1969	Burkina Faso_Fruit products	1
1970	Burkina Faso_Food products and feeds n.e.c.	1
1971	Burkina Faso_Sugar refining; cocoa, chocolate and confectionery	1
1972	Burkina Faso_Animal oils and fats	1
1973	Burkina Faso_Vegetable oils and fats	1
1974	Burkina Faso_Dairy products	1
1975	Burkina Faso_Alcoholic and other beverages	1
1976	Burkina Faso_Tobacco products	1
1977	Burkina Faso_Textiles and clothing	1
1978	Burkina Faso_Leather and footwear	1
1979	Burkina Faso_Sawmill products	1
1980	Burkina Faso_Pulp and paper	1
1981	Burkina Faso_Printing	1
1982	Burkina Faso_Coke oven products	1
1983	Burkina Faso_Refined petroleum products	1
1984	Burkina Faso_Nitrogenous fertilizers	1
1985	Burkina Faso_Non-nitrogenous and mixed fertilizers	1
1986	Burkina Faso_Basic petrochemical products	1
1987	Burkina Faso_Basic inorganic chemicals	1
1988	Burkina Faso_Basic organic chemicals	1
1989	Burkina Faso_Pharmaceuticals and medicinal products	1
1990	Burkina Faso_Dyes, paints, glues, detergents and other chemical products	1
1991	Burkina Faso_Rubber products	1
1992	Burkina Faso_Plastic products	1
1993	Burkina Faso_Clay building materials	1
1994	Burkina Faso_Glass and other ceramics n.e.c.	1
1995	Burkina Faso_Cement, lime and plaster products	1
1996	Burkina Faso_Other non-metallic mineral products n.e.c.	1
1997	Burkina Faso_Basic iron and steel	1
1998	Burkina Faso_Basic aluminium	1
1999	Burkina Faso_Basic Copper	1
[truncated: 17,681 more rows]

## Sheet: Table S6
Rank	Country	Total PIFL (w.e.)	Japan-induced (w.e.)	Japan's share (%)
1	Japan†	90619	4706	5.19
2	Myanmar	256627	4181	1.63
3	Azerbaijan	40382	517	1.28
4	Vietnam	201980	2561	1.27
5	Thailand	114387	1364	1.19
6	Singapore	8199	63	0.77
7	Malaysia	84298	614	0.73
8	Guinea	13392	94	0.7
9	Cambodia	34483	229	0.66
10	Philippines	445089	2934	0.66
11	Mauritania	58347	300	0.51
12	China	1835544	8765	0.48
13	Eq. Guinea	3002	14	0.46
14	Chile	40056	156	0.39
15	South Korea	116510	447	0.38
16	Libya	10901	40	0.37
17	Ireland	3279	12	0.37
18	Indonesia	896754	3156	0.35
19	South Africa	61844	212	0.34
20	Brunei	658	2	0.34
†Japan represents the domestic footprint (products manufactured within Japan). w.e. = worker-equivalents. Total PIFL = private forced labour from this study's satellite account.

## Sheet: Table S7
High-risk weight	Japan mfg. footprint (w.e.)	Male share (%)	Top-10 concentration (%)	LM share (%)	UM share (%)	World mfg. baseline (%)
1 (no weighting)	45284	53.9	70.6	49	28.9	55.4
3	48330	54	72.1	49.3	29.9	55.3
5 (baseline)	51011	54.2	73.2	49.5	30.7	55.3
10	56577	54.6	75.3	49.6	32.5	55.3
Note: The high-risk weight is applied to sectors on the US Department of Labor list of goods produced by forced labour; all other sectors receive a weight of 1. The baseline analysis uses a weight of 5. Absolute magnitudes rise with the weight, but the relative patterns (concentration, income-group shares, gender structure) are essentially unchanged.

## Sheet: Table S8
Scenario	Japan mfg. footprint (w.e.)	Male share (%)	Top-10 concentration (%)	Rank correlation
Correlated −25%	38259	54.2	73.2	—
Baseline	51011	54.2	73.2	1
Correlated +25%	63764	54.2	73.2	—
Independent ±25% (mean)	50992	54.2	73.2	0.995
Independent ±25% (95% CI)	[47,052, 55,084]	[53.8, 54.6]	[70.7, 75.3]	min 0.993
Note: Correlated scenarios apply a uniform ±25% shift to the GSI prevalence estimates of all countries. The Monte Carlo applies independent U(−25%, +25%) perturbations across countries (1,000 draws); the rank correlation is the Spearman correlation of the country-level footprint ranking with the baseline. Absolute totals scale with prevalence, whereas the male share, concentration ratio, and coun…
